# Supplementary material
Source: publisher site journal article supplement (https://www.dovepress.com/article/345034)
Supplement: Supplementary file 1 [file get_supplementary_file.php]

## Appendix A: Full search strategy

### Low and Middle Income Countries – LMIC Filters

#### The Cochrane Central Register of Controlled Trials (CENTRAL) (Cochrane Library Online)

- #1** (Africa or Asia or Caribbean or "West Indies" or "South America" or "Latin America" or "Central America"):ti,ab,kw
- #2** (Afghanistan or Albania or Algeria or Angola or Antigua or Barbuda or Argentina or Armenia or Armenian or Aruba or Azerbaijan or Bahrain or Bangladesh or Barbados or Benin or Byelarus or Byelorussian or Belarus or Belorussian or Belorussia or Belize or Bhutan or Bolivia or Bosnia or Herzegovina or Hercegovina or Botswana or Brasil or Brazil or Bulgaria or "Burkina Faso" or "Burkina Fasso" or "Upper Volta" or Burundi or Urundi or Cambodia or "Khmer Republic" or Kampuchea or Cameroon or Cameroons or Cameron or Camerons or "Cape Verde" or "Central African Republic" or Chad or Chile or China or Colombia or Comoros or "Comoro Islands" or Comores or Mayotte or Congo or Zaire or "Costa Rica" or "Cote d'Ivoire" or "Ivory Coast" or Croatia or Cuba or Cyprus or Czechoslovakia or "Czech Republic" or Slovakia or "Slovak Republic"):ti,ab,kw
- #3** (Djibouti or "French Somaliland" or Dominica or "Dominican Republic" or "East Timor" or "East Timur" or "Timor Leste" or Ecuador or Egypt or "United Arab Republic" or "El Salvador" or Eritrea or Estonia or Ethiopia or Fiji or Gabon or "Gabonese Republic" or Gambia or Gaza or Georgia or Georgian or Ghana or "Gold Coast" or Greece or Grenada or Guatemala or Guinea or Guam or Guiana or Guyana or Haiti or Honduras or Hungary or India or Maldives or Indonesia or Iran or Iraq or "Isle of Man" or Jamaica or Jordan or Kazakhstan or Kazakh or Kenya or Kiribati or Korea or Kosovo or Kyrgyzstan or Kirghizia or "Kyrgyz Republic" or Kirghiz or Kirgizstan or "Lao PDR" or Laos or Latvia or Lebanon or Lesotho or Basutoland or Liberia or Libya or Lithuania):ti,ab,kw
- #4** (Macedonia or Madagascar or "Malagasy Republic" or Malaysia or Malaya or Malay or Sabah or Sarawak or Malawi or Nyasaland or Mali or Malta or "Marshall Islands" or Mauritania or Mauritius or "Agalega Islands" or Mexico or Micronesia or "Middle East" or Moldova or Moldovia or Moldovian or Mongolia or Montenegro or Morocco or Ifni or Mozambique or Myanmar or Myanma or Burma or Namibia or Nepal or "Netherlands Antilles" or "New Caledonia" or Nicaragua or Niger or Nigeria or "Northern Mariana Islands" or Oman or Muscat or Pakistan or Palau or Palestine or Panama or Paraguay or Peru or Philippines or Philipines or Phillipines or Phillippines or Poland or Portugal or "Puerto Rico"):ti,ab,kw
- #5** (Romania or Rumania or Roumania or Russia or Russian or Rwanda or Ruanda or "Saint Kitts" or "St Kitts" or Nevis or "Saint Lucia" or "St Lucia" or "Saint Vincent" or "St Vincent" or Grenadines or Samoa or "Samoan Islands" or "Navigator Island" or "Navigator Islands" or "Sao Tome" or "Saudi Arabia" or Senegal or Serbia or Montenegro or Seychelles or "Sierra Leone" or Slovenia or "Sri Lanka" or Ceylon or "Solomon Islands" or Somalia or Sudan or Suriname or Surinam or Swaziland or Syria or Tajikistan or Tadjhikistan or Tadjikistan or Tadjhik or Tanzania or Thailand or Togo or "Togolese Republic" or Tonga or Trinidad or Tobago or Tunisia or Turkey or Turkmenistan or Turkmen or Uganda or Ukraine or Uruguay or USSR or "Soviet Union" or "Union of Soviet Socialist Republics" or

- Uzbekistan or Uzbek or Vanuatu or "New Hebrides" or Venezuela or Vietnam or "Viet Nam" or "West Bank" or Yemen or Yugoslavia or Zambia or Zimbabwe or Rhodesia):**ti,ab,kw**
- #6** (developing or less\* NEXT developed or "under developed" or underdeveloped or "middle income" or low\* NEXT income or underserved or "under served" or deprived or poor\*) NEXT (countr\* or nation\* or population\* or world):**ti,ab,kw**
- #7** (developing or less\* NEXT developed or "under developed" or underdeveloped or "middle income" or low\* NEXT income) NEXT (economy or economies):**ti,ab,kw**
- #8** low\* NEXT (gdp or gnp or "gross domestic" or "gross national"):**ti,ab,kw**
- #9** (low NEAR/3 middle NEAR/3 countr\*):**ti,ab,kw**
- #10** (Imic or Imics or "third world" or "lami country" or "lami countries"):**ti,ab,kw**
- #11** ("transitional country" or "transitional countries"):**ti,ab,kw**
- #12** (#1 OR #2 OR #3 OR #4 OR #5 OR #6 OR #7 OR #8 OR #9 OR #10 OR #11)

## **EMBASE (Ovid)**

- 1. Developing Country.sh.**
- 2. (Africa or Asia or Caribbean or West Indies or South America or Latin America or Central America).hw,ti,ab,cp.**
- 3. (Afghanistan or Albania or Algeria or Angola or Antigua or Barbuda or Argentina or Armenia or Armenian or Aruba or Azerbaijan or Bahrain or Bangladesh or Barbados or Benin or Byelarus or Byelorussian or Belarus or Belorussian or Belorussia or Belize or Bhutan or Bolivia or Bosnia or Herzegovina or Hercegovina or Botswana or Brasil or Brazil or Bulgaria or Burkina Faso or Burkina Fasso or Upper Volta or Burundi or Urundi or Cambodia or Khmer Republic or Kampuchea or Cameroon or Cameroons or Cameron or Camerons or Cape Verde or Central African Republic or Chad or Chile or China or Colombia or Comoros or Comoro Islands or Comores or Mayotte or Congo or Zaire or Costa Rica or Cote d'Ivoire or Ivory Coast or Croatia or Cuba or Cyprus or Czechoslovakia or Czech Republic or Slovakia or Slovak Republic or Djibouti or French Somaliland or Dominica or Dominican Republic or East Timor or East Timur or Timor Leste or Ecuador or Egypt or United Arab Republic or El Salvador or Eritrea or Estonia or Ethiopia or Fiji or Gabon or Gabonese Republic or Gambia or Gaza or Georgia Republic or Georgian Republic or Ghana or Gold Coast or Greece or Grenada or Guatemala or Guinea or Guam or Guiana or Guyana or Haiti or Honduras or Hungary or India or Maldives or Indonesia or Iran or Iraq or Isle of Man or Jamaica or Jordan or Kazakhstan or Kazakh or Kenya or Kiribati or Korea or Kosovo or Kyrgyzstan or Kirghizia or Kyrgyz Republic or Kirghiz or Kirgizstan or Lao PDR or Laos or Latvia or Lebanon or Lesotho or Basutoland or Liberia or Libya or Lithuania or Macedonia or Madagascar or Malagasy Republic or Malaysia or Malaya or Malay or Sabah or Sarawak or Malawi or Nyasaland or Mali or Malta or Marshall Islands or Mauritania or Mauritius or Agalega Islands or Mexico or Micronesia or Middle East or Moldova or Moldavia or Moldovian or Mongolia or Montenegro or Morocco or Ifni or Mozambique or Myanmar or Myanma or Burma or Namibia or Nepal or Netherlands Antilles or New Caledonia or Nicaragua or Niger or Nigeria or Northern Mariana Islands or Oman or Muscat or Pakistan or Palau or Palestine or Panama or Paraguay or Peru or Philippines or Philipines or Phillipines or Phillippines or Poland or Portugal or Puerto Rico or Romania or Rumania or Roumania or Russia or Russian or Rwanda or Ruanda or Saint Kitts or St Kitts or**

Nevis or Saint Lucia or St Lucia or Saint Vincent or St Vincent or Grenadines or Samoa or Samoan Islands or Navigator Island or Navigator Islands or Sao Tome or Saudi Arabia or Senegal or Serbia or Montenegro or Seychelles or Sierra Leone or Slovenia or Sri Lanka or Ceylon or Solomon Islands or Somalia or South Africa or Sudan or Suriname or Surinam or Swaziland or Syria or Tajikistan or Tadjhikistan or Tadjikistan or Tadjhik or Tanzania or Thailand or Togo or Togolese Republic or Tonga or Trinidad or Tobago or Tunisia or Turkey or Turkmenistan or Turkmen or Uganda or Ukraine or Uruguay or USSR or Soviet Union or Union of Soviet Socialist Republics or Uzbekistan or Uzbek or Vanuatu or New Hebrides or Venezuela or Vietnam or Viet Nam or West Bank or Yemen or Yugoslavia or Zambia or Zimbabwe or Rhodesia).**hw,ti,ab,cp.**

4. ((developing or less\* developed or under developed or underdeveloped or middle income or low\* income or underserved or under served or deprived or poor\*) adj (countr\* or nation? or population? or world)).**ti,ab.**

5. ((developing or less\* developed or under developed or underdeveloped or middle income or low\* income) adj (economy or economies)).**ti,ab.**

6. (low\* adj (gdp or gnp or gross domestic or gross national)).**ti,ab.**

7. (low adj3 middle adj3 countr\*).**ti,ab.**

8. (lmic or lmics or third world or lami countr\*).**ti,ab.**

9. transitional countr\*.**ti,ab.**

10. or/1-9

## **MEDLINE (Ovid)**

1. Developing Countries.**sh,kf.**

2. (Africa or Asia or Caribbean or West Indies or South America or Latin America or Central America).**hw,kf,ti,ab,cp.**

3. (Afghanistan or Albania or Algeria or Angola or Antigua or Barbuda or Argentina or Armenia or Armenian or Aruba or Azerbaijan or Bahrain or Bangladesh or Barbados or Benin or Byelarus or Byelorussian or Belarus or Belorussian or Belorussia or Belize or Bhutan or Bolivia or Bosnia or Herzegovina or Hercegovina or Botswana or Brasil or Brazil or Bulgaria or Burkina Faso or Burkina Fasso or Upper Volta or Burundi or Urundi or Cambodia or Khmer Republic or Kampuchea or Cameroon or Cameroons or Cameron or Camerons or Cape Verde or Central African Republic or Chad or Chile or China or Colombia or Comoros or Comoro Islands or Comores or Mayotte or Congo or Zaire or Costa Rica or Cote d'Ivoire or Ivory Coast or Croatia or Cuba or Cyprus or Czechoslovakia or Czech Republic or Slovakia or Slovak Republic or Djibouti or French Somaliland or Dominica or Dominican Republic or East Timor or East Timur or Timor Leste or Ecuador or Egypt or United Arab Republic or El Salvador or Eritrea or Estonia or Ethiopia or Fiji or Gabon or Gabonese Republic or Gambia or Gaza or Georgia Republic or Georgian Republic or Ghana or Gold Coast or Greece or Grenada or Guatemala or Guinea or Guam or Guiana or Guyana or Haiti or Honduras or Hungary or India or Maldives or Indonesia or Iran or Iraq or Isle of Man or Jamaica or Jordan or Kazakhstan or Kazakh or Kenya or Kiribati or Korea or Kosovo or Kyrgyzstan or Kirghizia or Kyrgyz Republic or Kirghiz or Kirgizstan or Lao PDR or Laos or Latvia or Lebanon or Lesotho or Basutoland or Liberia or Libya or Lithuania or Macedonia or Madagascar or Malagasy Republic or Malaysia or Malaya or Malay or Sabah or Sarawak or Malawi or Nyasaland or Mali or Malta or Marshall Islands or Mauritania or Mauritius or Agalega Islands or Mexico or Micronesia or Middle East or

Moldova or Moldovia or Moldovian or Mongolia or Montenegro or Morocco or Ifni or Mozambique or Myanmar or Myanma or Burma or Namibia or Nepal or Netherlands Antilles or New Caledonia or Nicaragua or Niger or Nigeria or Northern Mariana Islands or Oman or Muscat or Pakistan or Palau or Palestine or Panama or Paraguay or Peru or Philippines or Philipines or Phillipines or Phillippines or Poland or Portugal or Puerto Rico or Romania or Rumania or Roumania or Russia or Russian or Rwanda or Ruanda or Saint Kitts or St Kitts or Nevis or Saint Lucia or St Lucia or Saint Vincent or St Vincent or Grenadines or Samoa or Samoan Islands or Navigator Island or Navigator Islands or Sao Tome or Saudi Arabia or Senegal or Serbia or Montenegro or Seychelles or Sierra Leone or Slovenia or Sri Lanka or Ceylon or Solomon Islands or Somalia or South Africa or Sudan or Suriname or Surinam or Swaziland or Syria or Tajikistan or TadzhiKistan or Tadjikistan or TadzhiK or Tanzania or Thailand or Togo or Togolese Republic or Tonga or Trinidad or Tobago or Tunisia or Turkey or Turkmenistan or Turkmen or Uganda or Ukraine or Uruguay or USSR or Soviet Union or Union of Soviet Socialist Republics or Uzbekistan or Uzbek or Vanuatu or New Hebrides or Venezuela or Vietnam or Viet Nam or West Bank or Yemen or Yugoslavia or Zambia or Zimbabwe or Rhodesia).**hw,kf,ti,ab,cp.**

**4.** ((developing or less\* developed or under developed or underdeveloped or middle income or low\* income or underserved or under served or deprived or poor\*) adj (countr\* or nation? or population? or world)).**ti,ab.**

**5.** ((developing or less\* developed or under developed or underdeveloped or middle income or low\* income) adj (economy or economies)).**ti,ab.**

**6.** (low\* adj (gdp or gnp or gross domestic or gross national)).**ti,ab.**

**7.** (low adj3 middle adj3 countr\*).**ti,ab.**

**8.** (Imic or Imics or third world or lami countr\*).**ti,ab.**

**9.** transitional countr\*.**ti,ab.**

**10.** or/1-9

## Cochrane Database

1. [mh "pulmonary disease, chronic obstructive"]
2. Chronic obstructive pulmonary disease
3. COPD
4. [mh emphysema]
5. Emphysema
6. [mh "Bronchitis, Chronic"]
7. Chronic bronchitis
8. [mh "Tuberculosis, Pulmonary"]
9. Tuberculosis
10. [mh "Respiratory Tract Diseases"]
11. Lung diseases
12. Respiratory Tract Diseases
13. [mh "Lung Neoplasms"]
14. [mh Asthma]
15. Asthma
16. (lung adj3 (cancer or tumo\* or neoplasm\*))
17. (Pulmonary adj3 hypertension)
18. [mh "Hypertension, Pulmonary"]
19. Pulmonary artery pressure
20. Pulmonary arterial pressure
21. Right ventricular systolic pressure
22. mPap
23. [mh "Idiopathic Interstitial Pneumonias"]
24. Idiopathic pulmonary fibrosis
25. [mh "Lung Diseases, Interstitial"]
26. Interstitial lung disease
27. [mh "Pulmonary Fibrosis"]
28. Cryptogenic fibrosing alveolitis
29. [mh "Alveolitis, Extrinsic Allergic"]
30. Usual interstitial pneumonia
31. Idiopathic fibrosing alveolitis
32. {or #1-#31}
33. [mh "Motor Activity"]
34. [mh "Leisure Activities"]
35. ((aerobic or motor or leisure) adj3 activit\*)
36. physical fitness
37. [mh sports]
38. sport\*
39. [mh recreation] or recreation
40. [mh exercise]
41. exercis\*
42. fitness
43. walk\* or [mh walking]
44. [mh "sedentary behavior"] or sedentar\*
45. sitting
46. reclining

47. lying
48. (Physical\* adj3 inactivit\*)
49. leisure time behavio\*
50. [mh "screen time"]
51. small screen
52. [mh television]
53. (television or TV)
54. electronic media
55. [mh "video games"]
56. [mh "social media"]
57. [mh internet]
58. "social media"
59. [mh smartphone]
60. [mh "computers, handheld"]
61. [mh "cell phone"]
62. [mh computers]
63. [mh reading] or [mh writing]
64. ((reading or writing or studying) adj3 time)
65. [mh "automobile driving"]
66. (driving adj3 time)
67. passive transportation
68. (active adj3 (travel\* or transport\*))
69. [mh bicyling] or bicycl\* or cycle or cycling
70. [mh "physical exertion"]
71. (energy expenditure) or [mh "energy metabolism"]
72. (sleep\* adj3 (hour\* or duration or time or length or period or span))
73. [mh sleep]
74. {or #33-#73}
75. (Africa or Asia or Caribbean or "West Indies" or "South America" or "Latin America" or "Central America"):ti,ab,kw
76. (Afghanistan or Albania or Algeria or Angola or Antigua or Barbuda or Argentina or Armenia or Armenian or Aruba or Azerbaijan or Bahrain or Bangladesh or Barbados or Benin or Byelarus or Byelorussian or Belarus or Belorussian or Belorussia or Belize or Bhutan or Bolivia or Bosnia or Herzegovina or Hercegovina or Botswana or Brasil or Brazil or Bulgaria or "Burkina Faso" or "Burkina Fasso" or "Upper Volta" or Burundi or Urundi or Cambodia or "Khmer Republic" or Kampuchea or Cameroon or Cameroons or Cameron or Camerons or "Cape Verde" or "Central African Republic" or Chad or Chile or China or Colombia or Comoros or "Comoro Islands" or Comores or Mayotte or Congo or Zaire or "Costa Rica" or "Coted'Ivoire" or "Ivory Coast" or Croatia or Cuba or Cyprus or Czechoslovakia or "Czech Republic" or Slovakia or "Slovak Republic"):ti,ab,kw
77. (Djiboutior "French Somaliland" or Dominica or "Dominican Republic" or "East Timor" or "East Timur" or "Timor Leste" or Ecuador or Egypt or "United Arab Republic" or "El Salvador" or Eritrea or Estonia or Ethiopia or Fiji or Gabon or "Gabonese Republic" or Gambia or Gaza or Georgia or Georgian or Ghana or "Gold Coast" or Greece or Grenada or Guatemala or Guinea or Guam or Guiana or Guyana or Haiti or Honduras or Hungary or India or Maldives or Indonesia or Iran or Iraq or "Isle of Man" or Jamaica or Jordan or Kazakhstan or Kazakh or Kenya or Kiribati or Korea or Kosovo or Kyrgyzstan or Kirghizia or "Kyrgyz Republic" or Kirghiz

- or Kirgizstan or "Lao PDR" or Laos or Latvia or Lebanon or Lesotho or Basutoland or Liberia or Libya or Lithuania):ti,ab,kw
78. (Macedonia or Madagascar or "Malagasy Republic" or Malaysia or Malaya or Malay or Sabah or Sarawak or Malawi or Nyasaland or Mali or Malta or "Marshall Islands" or Mauritania or Mauritius or "Agalega Islands" or Mexico or Micronesia or "Middle East" or Moldova or Moldavia or Moldovan or Mongolia or Montenegro or Morocco or Ifni or Mozambique or Myanmar or Myanma or Burma or Namibia or Nepal or "Netherlands Antilles" or "New Caledonia" or Nicaragua or Niger or Nigeria or "Northern Mariana Islands" or Oman or Muscat or Pakistan or Palau or Palestine or Panama or Paraguay or Peru or Philippines or Philipines or Phillipines or Phillippines or Poland or Portugal or "Puerto Rico"):ti,ab,kw
79. (Romania or Rumania or Roumania or Russia or Russian or Rwanda or Ruanda or "Saint Kitts" or "St Kitts" or Nevis or "Saint Lucia" or "St Lucia" or "Saint Vincent" or "St Vincent" or Grenadines or Samoa or "Samoa Islands" or "Navigator Island" or "Navigator Islands" or "Sao Tome" or "Saudi Arabia" or Senegal or Serbia or Montenegro or Seychelles or "Sierra Leone" or Slovenia or "Sri Lanka" or Ceylon or "Solomon Islands" or Somalia or Sudan or Suriname or Surinam or Swaziland or Syria or Tajikistan or Tadjhikistan or Tadjikistan or Tadjhik or Tanzania or Thailand or Togo or "Togolese Republic" or Tonga or Trinidad or Tobago or Tunisia or Turkey or Turkmenistan or Turkmen or Uganda or Ukraine or Uruguay or USSR or "Soviet Union" or "Union of Soviet Socialist Republics" or Uzbekistan or Uzbek or Vanuatu or "New Hebrides" or Venezuela or Vietnam or "Viet Nam" or "West Bank" or Yemen or Yugoslavia or Zambia or Zimbabwe or Rhodesia):ti,ab,kw
80. (developing or less\* NEXT developed or "under developed" or underdeveloped or "middle income" or low\* NEXT income or underserved or "under served" or deprived or poor\*) NEXT (countr\* or nation\* or population\* or world):ti,ab,kw
81. (developing or less\* NEXT developed or "under developed" or underdeveloped or "middle income" or low\* NEXT income) NEXT (economy or economies):ti,ab,kw
82. low\* NEXT (gdp or gnp or "gross domestic" or "gross national"):ti,ab,kw
83. (low NEAR/3 middle NEAR/3 countr\*):ti,ab,kw
84. (Imic or Imics or "third world" or "lami country" or "lami countries"):ti,ab,kw
85. ("transitional country" or "transitional countries"):ti,ab,kw
86. {or #75-#85}
87. #32 and #74 and #86
88. (adult.mp.) or [mh "middle aged"] or age\*.tw.
89. #87 and #88
90. (child\* or adolescent or infan\*).tw.
91. #87 not #90

## Embase Database

- 1 chronic obstructive lungdisease/
- 2 copd.ti,ab.
- 3 Bronchitis/
- 4 Chronic bronchitis/
- 5 (chronic adj5 (obstruct\$ or limit#\$)).ti.
- 6 (obstruct\$ adj3 (airflow\$ or airway\$ or respirat\$ or lung or pulmonary) adj2 (disease\$ or disorder\$)).ti,ab.
- 7 Lung emphysema/
- 8 'chronic bronchitis'.ti,ab.
- 9 emphysema.ti,ab.
- 10 coad.ti,ab.
- 11 lung tuberculosis/
- 12 Tuberculosis.tw.
- 13 exp respiratory tract disease/
- 14 Lung diseases.mp. [mp=title, abstract, heading word, drug trade name, original title, device manufacturer, drug manufacturer, device trade name, keyword, floating subheading word, candidate term word]
- 15 Respiratory Tract Diseases.mp. [mp=title, abstract, heading word, drug trade name, original title, device manufacturer, drug manufacturer, device trade name, keyword, floating subheading word, candidate term word]
- 16 exp asthma/
- 17 Asthma.tw.
- 18 exp lung tumor/
- 19 (lung adj3 (cancer or tumo\* or neoplasm\*)).tw.
- 20 (Pulmonary adj3 hypertension).tw.
- 21 pulmonary hypertension/
- 22 lung artery pressure/
- 23 Pulmonary artery pressure.mp. [mp=title, abstract, heading word, drug trade name, original title, device manufacturer, drug manufacturer, device trade name, keyword, floating subheading word, candidate term word]
- 24 Pulmonary arterial pressure.mp.
- 25 Right ventricular systolic pressure.mp.
- 26 mPap.mp.
- 27 interstitial pneumonia/
- 28 Idiopathic Interstitial Pneumonia.mp. [mp=title, abstract, heading word, drug trade name, original title, device manufacturer, drug manufacturer, device trade name, keyword, floating subheading word, candidate term word]
- 29 fibrosing alveolitis/
- 30 Idiopathic pulmonary fibrosis.mp. [mp=title, abstract, heading word, drug trade name, original title, device manufacturer, drug manufacturer, device trade name, keyword, floating subheading word, candidate term word]
- 31 exp interstitial lung disease/
- 32 Interstitial Lung Diseases.mp. [mp=title, abstract, heading word, drug trade name, original title, device manufacturer, drug manufacturer, device trade name, keyword, floating subheading word, candidate term word]
- 33 lung fibrosis/



- 34 Pulmonary Fibrosis.mp. [mp=title, abstract, heading word, drug trade name, original title, device manufacturer, drug manufacturer, device trade name, keyword, floating subheading word, candidate term word]
- 35 Cryptogenic fibrosing alveolitis.mp.
- 36 allergic pneumonitis/
- 37 Extrinsic Allergic Alveolitis.mp. [mp=title, abstract, heading word, drug trade name, original title, device manufacturer, drug manufacturer, device trade name, keyword, floating subheading word, candidate term word]
- 38 Usual interstitial pneumonia.mp.
- 39 Idiopathic fibrosing alveolitis.mp.
- 40 or/1-39
- 41 motor activity/
- 42 leisure/
- 43 (((aerobic or motor or leisure) adj3 activit\*) or "physical\* activ\*").tw.
- 44 fitness/
- 45 physical fitness.tw.
- 46 exp sport/
- 47 sport\*.tw.
- 48 recreation/
- 49 Recreation.tw.
- 50 exp exercise/
- 51 exercis\*.tw.
- 52 walk\*.tw. or Walking/
- 53 Sedentary Behavior.mp. or sedentary lifestyle/
- 54 sitting.tw.
- 55 reclining.tw.
- 56 "lying down".tw.
- 57 (Physical\* adj3 inactivit\*).tw.
- 58 leisure time behavio\*.tw.
- 59 screen time/
- 60 small screen.tw.
- 61 Television/
- 62 (television or TV).tw.
- 63 electronic media.tw.
- 64 video game/
- 65 social media/
- 66 Internet/
- 67 "social media".tw.
- 68 smartphone/
- 69 personal digital assistant/
- 70 mobile phone/
- 71 Computers/
- 72 reading/
- 73 writing/
- 74 ((reading or writing or studying) adj3 time).tw.
- 75 car driving/
- 76 (driving adj3 time).tw.
- 77 passive transportation.tw.

- 78 (active adj3 (travel\* or transport\*)).tw.
- 79 cycling/
- 80 (bicycl\* or cycling).tw.
- 81 Physical Exertion.mp. [mp=title, abstract, heading word, drug trade name, original title, device manufacturer, drug manufacturer, device trade name, keyword, floating subheading word, candidate term word]
- 82 energy expenditure.mp. or energy expenditure/
- 83 (sleep\* adj3 (hour\* or duration or time or length or period or span)).tw.
- 84 exp sleep/
- 85 or/41-84
- 86 Developing Country.sh.
- 87 (Africa or Asia or Caribbean or West Indies or South America or Latin America or Central America).hw,ti,ab,cp.
- 88 (Afghanistan or Albania or Algeria or Angola or Antigua or Barbuda or Argentina or Armenia or Armenian or Aruba or Azerbaijan or Bahrain or Bangladesh or Barbados or Benin or Byelarus or Byelorussian or Belarus or Belorussian or Belorussia or Belize or Bhutan or Bolivia or Bosnia or Herzegovina or Hercegovina or Botswana or Brasil or Brazil or Bulgaria or Burkina Faso or Burkina Fasso or Upper Volta or Burundi or Urundi or Cambodia or Khmer Republic or Kampuchea or Cameroon or Cameroons or Cameron or Camerons or Cape Verde or Central African Republic or Chad or Chile or China or Colombia or Comoros or Comoro Islands or Comores or Mayotte or Congo or Zaire or Costa Rica or Cote d'Ivoire or Ivory Coast or Croatia or Cuba or Cyprus or Czechoslovakia or Czech Republic or Slovakia or Slovak Republic or Djibouti or French Somaliland or Dominica or Dominican Republic or East Timor or East Timur or Timor Leste or Ecuador or Egypt or United Arab Republic or El Salvador or Eritrea or Estonia or Ethiopia or Fiji or Gabon or Gabonese Republic or Gambia or Gaza or Georgia Republic or Georgian Republic or Ghana or Gold Coast or Greece or Grenada or Guatemala or Guinea or Guam or Guiana or Guyana or Haiti or Honduras or Hungary or India or Maldives or Indonesia or Iran or Iraq or Isle of Man or Jamaica or Jordan or Kazakhstan or Kazakh or Kenya or Kiribati or Korea or Kosovo or Kyrgyzstan or Kirghizia or Kyrgyz Republic or Kirghiz or Kirgizstan or Lao PDR or Laos or Latvia or Lebanon or Lesotho or Basutoland or Liberia or Libya or Lithuania or Macedonia or Madagascar or Malagasy Republic or Malaysia or Malaya or Malay or Sabah or Sarawak or Malawi or Nyasaland or Mali or Malta or Marshall Islands or Mauritania or Mauritius or Agalega Islands or Mexico or Micronesia or Middle East or Moldova or Moldovia or Moldovian or Mongolia or Montenegro or Morocco or Ifni or Mozambique or Myanmar or Myanma or Burma or Namibia or Nepal or Netherlands Antilles or New Caledonia or Nicaragua or Niger or Nigeria or Northern Mariana Islands or Oman or Muscat or Pakistan or Palau or Palestine or Panama or Paraguay or Peru or Philippines or Philipines or Phillipines or Phillippines or Poland or Portugal or Puerto Rico or Romania or Rumania or Roumania or Russia or Russian or Rwanda or Ruanda or Saint Kitts or St Kitts or Nevis or Saint Lucia or St Lucia or Saint Vincent or St Vincent or Grenadines or Samoa or Samoan Islands or Navigator Island or Navigator Islands or Sao Tome or Saudi Arabia or Senegal or Serbia or Montenegro or Seychelles or Sierra Leone or Slovenia or Sri Lanka or Ceylon or Solomon Islands or Somalia or South Africa or Sudan or Suriname or Surinam or Swaziland or Syria or Tajikistan or Tadzhikistan or Tadjikistan or Tadjhik or Tanzania or Thailand or Togo or Togolese Republic or Tonga or Trinidad or Tobago or Tunisia or Turkey or Turkmenistan or Turkmen or Uganda or Ukraine or Uruguay or USSR or Soviet

- Union or Union of Soviet Socialist Republics or Uzbekistan or Uzbek or Vanuatu or New Hebrides or Venezuela or Vietnam or Viet Nam or West Bank or Yemen or Yugoslavia or Zambia or Zimbabwe or Rhodesia).hw,ti,ab,cp.
- 89 ((developing or less\* developed or under developed or underdeveloped or middle income or low\* income or underserved or under served or deprived or poor\*) adj (countr\* or nation? or population? or world)).ti,ab.
- 90 ((developing or less\* developed or under developed or underdeveloped or middle income or low\* income) adj (economy or economies)).ti,ab.
- 91 (low\* adj (gdp or gnp or gross domestic or gross national)).ti,ab.
- 92 (low adj3 middle adj3 countr\*).ti,ab.
- 93 (lmic or lmic3 or third world or lami countr\*).ti,ab.
- 94 transitional countr\*.ti,ab.
- 95 or/86-94
- 96 40 and 85 and 95
- 97 adult.mp. or middle aged.sh. or age:.tw.
- 98 96 and 97
- 99 exp \*adolescence/ or exp \*adolescent/ or exp \*child/ or exp \*childhood disease/ or exp \*infant disease/ or (adolescen\* or babies or baby or boy? or boyfriend or boyhood or girlfriend or girlhood or child or child\* or child\*3 or children\* or girl? or infan\* or juvenil\* or juvenile\* or kid? or minors or minors\* or neonat\* or neo-nat\* or newborn\* or new-born\* or paediatric\* or peadiatric\* or pediatric\* or perinat\* or preschool\* or puber\* or pubescen\* or school\* or teen\* or toddler? or underage? or under-age? or youth\*).ti,kw.
- 10098 not 99

## EMCare Database

- 1 chronic obstructive lungdisease/
- 2 copd.ti,ab.
- 3 Bronchitis/
- 4 Chronic bronchitis/
- 5 (chronic adj5 (obstruct\$ or limit#\$)).ti.
- 6 (obstruct\$ adj3 (airflow\$ or airway\$ or respirat\$ or lung or pulmonary) adj2 (disease\$ or disorder\$)).ti,ab.
- 7 Lung emphysema/
- 8 'chronic bronchitis'.ti,ab.
- 9 emphysema.ti,ab.
- 10 coad.ti,ab.
- 11 lung tuberculosis/
- 12 Tuberculosis.tw.
- 13 exp respiratory tract disease/
- 14 Lung diseases.mp. [mp=title, abstract, heading word, drug trade name, original title, device manufacturer, drug manufacturer, device trade name, keyword]
- 15 Respiratory Tract Diseases.mp. [mp=title, abstract, heading word, drug trade name, original title, device manufacturer, drug manufacturer, device trade name, keyword]
- 16 exp asthma/
- 17 Asthma.tw.
- 18 exp lung tumor/
- 19 (lung adj3 (cancer or tumo\* or neoplasm\*)).tw.
- 20 (Pulmonary adj3 hypertension).tw.
- 21 pulmonary hypertension/
- 22 lung artery pressure/
- 23 Pulmonary artery pressure.mp. [mp=title, abstract, heading word, drug trade name, original title, device manufacturer, drug manufacturer, device trade name, keyword]
- 24 Pulmonary arterial pressure.mp.
- 25 Right ventricular systolic pressure.mp.
- 26 mPap.mp.
- 27 interstitial pneumonia/
- 28 Idiopathic Interstitial Pneumonia.mp. [mp=title, abstract, heading word, drug trade name, original title, device manufacturer, drug manufacturer, device trade name, keyword]
- 29 fibrosing alveolitis/
- 30 Idiopathic pulmonary fibrosis.mp. [mp=title, abstract, heading word, drug trade name, original title, device manufacturer, drug manufacturer, device trade name, keyword]
- 31 exp interstitial lung disease/
- 32 Interstitial Lung Diseases.mp. [mp=title, abstract, heading word, drug trade name, original title, device manufacturer, drug manufacturer, device trade name, keyword]
- 33 lung fibrosis/
- 34 Pulmonary Fibrosis.mp. [mp=title, abstract, heading word, drug trade name, original title, device manufacturer, drug manufacturer, device trade name, keyword]
- 35 Cryptogenic fibrosing alveolitis.mp.
- 36 allergic pneumonitis/

- 37 Extrinsic Allergic Alveolitis.mp. [mp=title, abstract, heading word, drug trade name, original title, device manufacturer, drug manufacturer, device trade name, keyword]
- 38 Usual interstitial pneumonia.mp.
- 39 Idiopathic fibrosingalveolitis.mp.
- 40 or/1-39
- 41 motor activity/
- 42 leisure/
- 43 (((aerobic or motor or leisure) adj3 activit\*) or "physical\* activ\*").tw.
- 44 fitness/
- 45 physical fitness.tw.
- 46 exp sport/
- 47 sport\*.tw.
- 48 recreation/
- 49 Recreation.tw.
- 50 exp exercise/
- 51 exercis\*.tw.
- 52 walk\*.tw. or Walking/
- 53 Sedentary Behavior.mp. or sedentary lifestyle/
- 54 sitting.tw.
- 55 reclining.tw.
- 56 "lying down".tw.
- 57 (Physical\* adj3 inactivit\*).tw.
- 58 leisure time behavio\*.tw.
- 59 screen time/
- 60 small screen.tw.
- 61 Television/
- 62 (television or TV).tw.
- 63 electronic media.tw.
- 64 video game/
- 65 social media/
- 66 Internet/
- 67 "social media".tw.
- 68 smartphone/
- 69 personal digital assistant/
- 70 mobile phone/
- 71 Computers/
- 72 reading/
- 73 writing/
- 74 ((reading or writing or studying) adj3 time).tw.
- 75 car driving/
- 76 (driving adj3 time).tw.
- 77 passive transportation.tw.
- 78 (active adj3 (travel\* or transport\*)).tw.
- 79 cycling/
- 80 (bicycl\* or cycling).tw.
- 81 Physical Exertion.mp. [mp=title, abstract, heading word, drug trade name, original title, device manufacturer, drug manufacturer, device trade name, keyword]
- 82 energy expenditure.mp. or energy expenditure/

- 83 (sleep\* adj3 (hour\* or duration or time or length or period or span)).tw.
- 84 exp sleep/
- 85 or/41-84
- 86 Developing Country.sh.
- 87 (Africa or Asia or Caribbean or West Indies or South America or Latin America or Central America).hw,ti,ab,cp.
- 88 (Afghanistan or Albania or Algeria or Angola or Antigua or Barbuda or Argentina or Armenia or Armenian or Aruba or Azerbaijan or Bahrain or Bangladesh or Barbados or Benin or Byelarus or Byelorussian or Belarus or Belorussian or Belorussia or Belize or Bhutan or Bolivia or Bosnia or Herzegovina or Hercegovina or Botswana or Brasil or Brazil or Bulgaria or Burkina Faso or Burkina Fasso or Upper Volta or Burundi or Urundi or Cambodia or Khmer Republic or Kampuchea or Cameroon or Cameroons or Cameron or Camerons or Cape Verde or Central African Republic or Chad or Chile or China or Colombia or Comoros or Comoro Islands or Comores or Mayotte or Congo or Zaire or Costa Rica or Cote d'Ivoire or Ivory Coast or Croatia or Cuba or Cyprus or Czechoslovakia or Czech Republic or Slovakia or Slovak Republic or Djibouti or French Somaliland or Dominica or Dominican Republic or East Timor or East Timur or Timor Leste or Ecuador or Egypt or United Arab Republic or El Salvador or Eritrea or Estonia or Ethiopia or Fiji or Gabon or Gabonese Republic or Gambia or Gaza or Georgia Republic or Georgian Republic or Ghana or Gold Coast or Greece or Grenada or Guatemala or Guinea or Guam or Guiana or Guyana or Haiti or Honduras or Hungary or India or Maldives or Indonesia or Iran or Iraq or Isle of Man or Jamaica or Jordan or Kazakhstan or Kazakh or Kenya or Kiribati or Korea or Kosovo or Kyrgyzstan or Kirghizia or Kyrgyz Republic or Kirghiz or Kirgizstan or Lao PDR or Laos or Latvia or Lebanon or Lesotho or Basutoland or Liberia or Libya or Lithuania or Macedonia or Madagascar or Malagasy Republic or Malaysia or Malaya or Malay or Sabah or Sarawak or Malawi or Nyasaland or Mali or Malta or Marshall Islands or Mauritania or Mauritius or Agalega Islands or Mexico or Micronesia or Middle East or Moldova or Moldovia or Moldovian or Mongolia or Montenegro or Morocco or Ifni or Mozambique or Myanmar or Myanma or Burma or Namibia or Nepal or Netherlands Antilles or New Caledonia or Nicaragua or Niger or Nigeria or Northern Mariana Islands or Oman or Muscat or Pakistan or Palau or Palestine or Panama or Paraguay or Peru or Philippines or Philipines or Phillipines or Phillippines or Poland or Portugal or Puerto Rico or Romania or Rumania or Roumania or Russia or Russian or Rwanda or Ruanda or Saint Kitts or St Kitts or Nevis or Saint Lucia or St Lucia or Saint Vincent or St Vincent or Grenadines or Samoa or Samoan Islands or Navigator Island or Navigator Islands or Sao Tome or Saudi Arabia or Senegal or Serbia or Montenegro or Seychelles or Sierra Leone or Slovenia or Sri Lanka or Ceylon or Solomon Islands or Somalia or South Africa or Sudan or Suriname or Surinam or Swaziland or Syria or Tajikistan or Tadjhikistan or Tadjikistan or Tadjhik or Tanzania or Thailand or Togo or Togolese Republic or Tonga or Trinidad or Tobago or Tunisia or Turkey or Turkmenistan or Turkmen or Uganda or Ukraine or Uruguay or USSR or Soviet Union or Union of Soviet Socialist Republics or Uzbekistan or Uzbek or Vanuatu or New Hebrides or Venezuela or Vietnam or Viet Nam or West Bank or Yemen or Yugoslavia or Zambia or Zimbabwe or Rhodesia).hw,ti,ab,cp.
- 89 ((developing or less\* developed or under developed or underdeveloped or middle income or low\* income or underserved or under served or deprived or poor\*) adj (countr\* or nation? or population? or world)).ti,ab.

- 90 ((developing or less\* developed or under developed or underdeveloped or middle income or low\* income) adj (economy or economies)).ti,ab.
- 91 (low\* adj (gdp or gnp or gross domestic or gross national)).ti,ab.
- 92 (low adj3 middle adj3 countr\*).ti,ab.
- 93 (lmic or lmic3 or third world or lami countr\*).ti,ab.
- 94 transitional countr\*.ti,ab.
- 95 or/86-94
- 96 40 and 85 and 95
- 97 adult.mp. or middle aged.sh. or age:.tw.
- 98 96 and 97
- 99 exp\*adolescence/ or exp\*adolescent/ or exp\*child/ or exp\*childhood disease/ or exp\*infant disease/ or (adolescen\* or babies or baby or boy? or boyfriend or boyhood or girlfriend or girlhood or child or child\* or child\*3 or children\* or girl? or infan\* or juvenil\* or juvenile\* or kid? or minors or minors\* or neonat\* or neo-nat\* or newborn\* or new-born\* or paediatric\* or peadiatric\* or pediatric\* or perinat\* or preschool\* or puber\* or pubescen\* or school\* or teen\* or toddler? or underage? or under-age? or youth\*).ti,kw.
- 10098 not 99

## Global Index Medicus search strategy

(mh:(pulmonary disease, chronic obstructive)) OR (tw:(copd)) OR (tw:(chronic obstructive pulmonary disease)) OR (mh:(Emphysema)) OR (tw:(Emphysema)) OR (mh:(Bronchitis, Chronic)) OR (tw:(Chronic bronchitis)) OR (mh:(Tuberculosis, Pulmonary)) OR (tw:(Tuberculosis)) OR (mh:(Respiratory Tract Diseases)) OR (tw:(Lung diseases)) OR (tw:(Respiratory Tract Diseases)) OR (mh:(Lung Neoplasms)) OR (mh:(Asthma)) OR (tw:(asthma)) OR (tw:(Pulmonary hypertension)) OR (mh:(Hypertension, Pulmonary)) OR (tw:(Pulmonary artery pressure)) OR (tw:(Pulmonary arterial pressure)) OR (tw:(Right ventricular systolic pressure)) OR (tw:(mPap)) OR (mh:(Idiopathic Interstitial Pneumonias)) OR (tw:(Idiopathic pulmonary fibrosis)) OR (mh:(Lung Diseases, Interstitial)) OR (mh:(Pulmonary Fibrosis)) OR (tw:(Cryptogenic fibrosing alveolitis)) OR (mh:(Alveolitis, Extrinsic Allergic)) OR (tw:(Usual interstitial pneumonia)) OR (tw:(Idiopathic fibrosing alveolitis))

AND

(mh:(Motor Activity)) OR (mh:(Leisure Activities)) OR (tw:((((aerobic or motor or leisure) adj3 activit\* or "physical\* activ\*")))) OR (mh:(Physical Fitness)) OR (tw:(Physical Fitness)) OR (mh:(Sports)) OR (tw:(sport\*)) OR (tw:(recreation)) OR (mh:(recreation)) OR (mh:(Exercise)) OR (tw:(Exercis\*)) OR (tw:(fitness)) OR (tw:(walk\*)) OR (mh:(Walking)) OR (mh:(Sedentary Behavior)) OR (tw:(sedentar\*)) OR (tw:(sitting)) OR (tw:(reclining)) OR (tw:(("lying down"))) OR (tw:(Physical\* adj3 inactivit\*)) OR (tw:(leisure time behavio\*)) OR (mh:(Screen Time)) OR (tw:(small screen)) OR (mh:(Television)) OR (tw:(Television or TV)) OR (tw:(electronic media)) OR (mh:(video games)) OR (mh:(Social Media)) OR (mh:(internet)) OR (tw:(("social media".)) OR (mh:(Smartphone)) OR (mh:(Computers, Handheld)) OR (mh:(Cell Phone)) OR (mh:(Computers)) OR (mh:(reading)) OR (mh:(writing)) OR (tw:((((reading or writing or studying) adj3 time)))) OR (mh:(Automobile Driving)) OR (tw:(driving adj3 time)) OR (tw:(passive transportation)) OR (tw:(active adj3 (travel\* or transport\*))) OR (mh:(bicycling)) OR (tw:(bicycl\* or cycling)) OR (mh:(Physical Exertion)) OR (tw:(energy expenditure)) OR (mh:(Energy Metabolism)) OR (tw:(sleep\* adj3 (hour\* or duration or time or length or period or span)))) OR (mh:(Sleep))



## Ovid MEDLINE(R) Database

- 1 Pulmonary Disease, Chronic Obstructive/
- 2 Chronic obstructive pulmonary disease.tw.
- 3 COPD.mp. [mp=title, abstract, original title, name of substance word, subject heading word, floating sub-heading word, keyword heading word, organism supplementary concept word, protocol supplementary concept word, rare disease supplementary concept word, unique identifier, synonyms]
- 4 Emphysema/
- 5 Emphysema.tw.
- 6 Bronchitis, Chronic/
- 7 Chronic bronchitis.tw.
- 8 exp Tuberculosis, Pulmonary/
- 9 Tuberculosis.tw.
- 10 exp Respiratory Tract Diseases/
- 11 Lung diseases.mp.
- 12 Respiratory Tract Diseases.mp. [mp=title, abstract, original title, name of substance word, subject heading word, floating sub-heading word, keyword heading word, organism supplementary concept word, protocol supplementary concept word, rare disease supplementary concept word, unique identifier, synonyms]
- 13 exp Lung Neoplasms/
- 14 exp Asthma/
- 15 Asthma.tw.
- 16 (lung adj3 (cancer or tumo\* or neoplasm\*)).tw.
- 17 (Pulmonary adj3 hypertension).tw.
- 18 Hypertension, Pulmonary/
- 19 Pulmonary artery pressure.mp.
- 20 Pulmonary arterial pressure.mp.
- 21 Right ventricular systolic pressure.mp.
- 22 mPap.mp.
- 23 exp Idiopathic Interstitial Pneumonias/
- 24 Idiopathic pulmonary fibrosis.mp. [mp=title, abstract, original title, name of substance word, subject heading word, floating sub-heading word, keyword heading word, organism supplementary concept word, protocol supplementary concept word, rare disease supplementary concept word, unique identifier, synonyms]
- 25 exp Lung Diseases, Interstitial/
- 26 Interstitial lung disease.mp. [mp=title, abstract, original title, name of substance word, subject heading word, floating sub-heading word, keyword heading word, organism supplementary concept word, protocol supplementary concept word, rare disease supplementary concept word, unique identifier, synonyms]
- 27 exp Pulmonary Fibrosis/
- 28 Cryptogenic fibrosing alveolitis.mp.
- 29 Alveolitis, Extrinsic Allergic/
- 30 Usual interstitial pneumonia.mp.
- 31 Idiopathic fibrosing alveolitis.mp. [mp=title, abstract, original title, name of substance word, subject heading word, floating sub-heading word, keyword heading word, organism supplementary concept word, protocol supplementary concept word, rare disease supplementary concept word, unique identifier, synonyms]

32 or/1-31  
33 Motor Activity/  
34 Leisure Activities/  
35 (((aerobic or motor or leisure) adj3 activit\*) or "physical\* activ\*").tw.  
36 Physical Fitness/  
37 physical fitness.tw.  
38 exp Sports/  
39 sport\*.tw.  
40 recreation.tw. or Recreation/  
41 exp Exercise/  
42 exercis\*.tw.  
43 exp Physical Fitness/  
44 fitness.tw.  
45 walk\*.tw. or Walking/  
46 Sedentary Behavior/ orsedentar\*.mp.  
47 sitting.tw.  
48 reclining.tw.  
49 "lying down".tw.  
50 (Physical\* adj3 inactivit\*).tw.  
51 leisure time behavio\*.tw.  
52 Screen Time/  
53 small screen.tw.  
54 Television/  
55 (television or TV).tw.  
56 electronic media.tw.  
57 video games/  
58 Social Media/  
59 internet/  
60 "social media".tw.  
61 Smartphone/  
62 Computers, Handheld/  
63 Cell Phone/  
64 Computers/  
65 reading/ or writing/  
66 ((reading or writing or studying) adj3 time).tw.  
67 Automobile Driving/  
68 (driving adj3 time).tw.  
69 passive transportation.tw.  
70 (active adj3 (travel\* or transport\*)).tw.  
71 bicycling/ or bicycl\*.tw. or cycling.tw.  
72 Physical Exertion/  
73 energy expenditure.mp. or Energy Metabolism/  
74 (sleep\* adj3 (hour\* or duration or time or length or period or span)).tw.  
75 exp Sleep/  
76 or/33-75  
77 Developing Countries.sh,kf.  
78 (Africa or Asia or Caribbean or West Indies or South America or Latin America or Central  
America).hw,kf,ti,ab,cp.

79 83 (Afghanistan or Albania or Algeria or Angola or Antigua or Barbuda or Argentina or Armenia or Armenian or Aruba or Azerbaijan or Bahrain or Bangladesh or Barbados or Benin or Byelarus or Byelorussian or Belarus or Belorussian or Belorussia or Belize or Bhutan or Bolivia or Bosnia or Herzegovina or Hercegovina or Botswana or Brasil or Brazil or Bulgaria or Burkina Faso or Burkina Fasso or Upper Volta or Burundi or Urundi or Cambodia or Khmer Republic or Kampuchea or Cameroon or Cameroons or Cameron or Camerons or Cape Verde or Central African Republic or Chad or Chile or China or Colombia or Comoros or Comoro Islands or Comores or Mayotte or Congo or Zaire or Costa Rica or Cote d'Ivoire or Ivory Coast or Croatia or Cuba or Cyprus or Czechoslovakia or Czech Republic or Slovakia or Slovak Republic or Djibouti or French Somaliland or Dominica or Dominican Republic or East Timor or East Timur or Timor Leste or Ecuador or Egypt or United Arab Republic or El Salvador or Eritrea or Estonia or Ethiopia or Fiji or Gabon or Gabonese Republic or Gambia or Gaza or Georgia Republic or Georgian Republic or Ghana or Gold Coast or Greece or Grenada or Guatemala or Guinea or Guam or Guiana or Guyana or Haiti or Honduras or Hungary or India or Maldives or Indonesia or Iran or Iraq or Isle of Man or Jamaica or Jordan or Kazakhstan or Kazakh or Kenya or Kiribati or Korea or Kosovo or Kyrgyzstan or Kirghizia or Kyrgyz Republic or Kirghiz or Kirgizstan or Lao PDR or Laos or Latvia or Lebanon or Lesotho or Basutoland or Liberia or Libya or Lithuania or Macedonia or Madagascar or Malagasy Republic or Malaysia or Malaya or Malay or Sabah or Sarawak or Malawi or Nyasaland or Mali or Malta or Marshall Islands or Mauritania or Mauritius or Agalega Islands or Mexico or Micronesia or Middle East or Moldova or Moldovia or Moldovian or Mongolia or Montenegro or Morocco or Ifni or Mozambique or Myanmar or Myanma or Burma or Namibia or Nepal or Netherlands Antilles or New Caledonia or Nicaragua or Niger or Nigeria or Northern Mariana Islands or Oman or Muscat or Pakistan or Palau or Palestine or Panama or Paraguay or Peru or Philippines or Philipines or Phillipines or Phillippines or Poland or Portugal or Puerto Rico or Romania or Rumania or Roumania or Russia or Russian or Rwanda or Ruanda or Saint Kitts or St Kitts or Nevis or Saint Lucia or St Lucia or Saint Vincent or St Vincent or Grenadines or Samoa or Samoan Islands or Navigator Island or Navigator Islands or Sao Tome or Saudi Arabia or Senegal or Serbia or Montenegro or Seychelles or Sierra Leone or Slovenia or Sri Lanka or Ceylon or Solomon Islands or Somalia or South Africa or Sudan or Suriname or Surinam or Swaziland or Syria or Tajikistan or Tadjhikistan or Tadjikistan or Tadjhik or Tanzania or Thailand or Togo or Togolese Republic or Tonga or Trinidad or Tobago or Tunisia or Turkey or Turkmenistan or Turkmen or Uganda or Ukraine or Uruguay or USSR or Soviet Union or Union of Soviet Socialist Republics or Uzbekistan or Uzbek or Vanuatu or New Hebrides or Venezuela or Vietnam or Viet Nam or West Bank or Yemen or Yugoslavia or Zambia or Zimbabwe or Rhodesia).hw,kf,ti,ab,cp.

80 (low\* adj (gdp or gnp or gross domestic or gross national)).ti,ab.

81 (low adj3 middle adj3 countr\*).ti,ab.

82 (Imic or Imics or third world or lami countr\*).ti,ab.

83 transitional countr\*.ti,ab.

84 or/77-83

85 32 and 76 and 84

86 animals/ not humans/

87 85 not 86

88 adult.mp. or middle aged.sh. or age:.tw.

89 87 and 88

90 (child: or adolescent or infan:).mp.

91 89 not 90

## CINAHL Database

1. MH Pulmonary Disease, Chronic Obstructive
2. Chronic obstructive pulmonary disease
3. COPD
4. MH Emphysema
5. Emphysema Expanders
6. MH Bronchitis, Chronic
7. Chronic bronchitis
8. MH Tuberculosis, Pulmonary
9. Tuberculosis Expanders
10. MH Respiratory Tract
11. Lung diseases
12. Respiratory Tract
13. MH Lung Neoplasms
14. MH Asthma
15. Asthma
16. lung n3 (cancer or tumor\* or neoplasm\*)
17. Pulmonary n3 hypertension
18. MH Hypertension, Pulmonary
19. Pulmonary artery pressure
20. Pulmonary arterial pressure
21. Right ventricular systolic pressure
22. mPap
23. MH Idiopathic Interstitial Pneumonias
24. Idiopathic pulmonary fibrosis
25. MH Lung Diseases, Interstitial
26. Interstitial lung disease
27. MH Pulmonary Fibrosis
28. Cryptogenic fibrosing alveolitis
29. MH Alveolitis, Extrinsic Allergic
30. Usual interstitial pneumonia
31. Idiopathic fibrosing alveolitis
32. S1 OR S2 OR S3 OR S4 OR S5 OR S6 OR S7 OR S8 OR S9 OR S10 OR S11 OR S12 OR S13 OR S14 OR S15 OR S16 OR S17 OR S18 OR S19 OR S20 OR S21 OR S22 OR S23 OR S24 OR S25 OR S26 OR S27 OR S28 OR S29 OR S30 OR S31 OR S32
33. MH Motor Activity
34. MH Leisure Activities
35. (((aerobic or motor or leisure) n3 activit\*) or "physical\* activ\*")
36. MH Physical Fitness
37. physical fitness
38. MH Sports
39. sport\*
40. recreation OR MH recreation
41. MH Exercise OR Exercis\*
42. fitness
43. walk\* OR MH Walking
44. MH Sedentary Behavior AND sedentar\*
45. sitting OR reclining OR "lying down"

46. Physical\* n3 inactivit\*
47. leisure time behavio\*
48. MH "Screen Time"
49. small screen
50. MH Television OR Television AND tv
51. electronic media
52. MHvideogames
53. MH Social Media
54. MH internet
55. "social media"
56. MH Smartphone
57. (MH "Computers, Hand-Held")
58. (MH "Cellular Phone")
59. (MH "Computers andComputerization")
60. (MH "Reading")
61. (MH "Writing")
62. ((reading or writing or studying) n3 time)
63. (MH "Automobile Driving")
64. driving n3 time
65. passive transportation
66. active n3 (travel\* or transport\*)
67. (MH "Cycling")
68. bicycl\* OR cycling
69. (MH "Exertion")
70. (MH "Energy Metabolism")
71. energy expenditure
72. sleep\* n3 (hour\* or duration or time or length or period or span)
73. MH sleep
74. S33 OR S34 OR 35 OR 36 OR 37 OR S38 OR S39 OR S40 OR S41 OR S42 OR S43 OR S44 OR S45  
OR S46 OR S47 OR S48 OR S49 OR S50 OR S51 OR S52 OR S53 OR S54 OR S55 OR S56 OR S57 OR S58  
OR S59 OR S60 OR S61 OR S62 OR S63 OR S64 OR S65 OR S66 OR S67 OR S68 OR S69 OR S70 OR S71  
OR S72 OR S73
75. MH Pulmonary Disease, Chronic Obstructive
76. Chronic obstructive pulmonarydisease
77. COPD
78. MH Emphysema
79. Emphysema
80. MH Bronchitis, Chronic
81. Chronic bronchitis
82. MH Tuberculosis, Pulmonary
83. Tuberculosis
84. MH Respiratory TractDiseases
85. Lung diseases
86. Respiratory Tract Diseases
87. MH Lung Neoplasms
88. MH Asthma
89. Asthma
90. lung n3 (cancer or tumo\* or neoplasm\*)

91. Pulmonary n3hypertension
92. MH Hypertension, Pulmonary
93. Pulmonary artery pressure
94. Pulmonary arterial pressure
95. Right ventricular systolicpressure
96. mPap
97. MH Idiopathic InterstitialPneumonias
98. Idiopathic pulmonaryfibrosis
99. MH Lung Diseases, Interstitial
100. Interstitial lung disease
101. MH Pulmonary Fibrosis
102. Cryptogenic fibrosing alveolitis
103. MHAlveolitis, ExtrinsicAllergic
104. Usual interstitialpneumonia
105. Idiopathic fibrosing alveolitis
106. S75OR S76OR S77OR S78OR S79OR S80OR S81OR S82OR S83OR S84OR S85OR S86OR S87OR S88OR S89OR S90OR S91OR S92OR S93OR S94OR S95OR S96OR S97OR S98OR S99OR S100OR S101OR S102OR S103OR S104OR S105
107. MH Motor Activity
108. MH Leisure Activities
109. (((aerobic or motor or leisure) n3 activit\*) or "physical\* activ\*")
110. MH Physical Fitness
111. physical fitness
112. MH Sports
113. sport\*
114. recreation OR MHrecreation
115. MH Exercise ORExercis\*
116. fitness
117. walk\* OR MHWalking
118. MH Sedentary Behavior AND sedentar\*
119. sitting OR reclining OR "lying down"
120. Physical\* n3 inactivit\*
121. leisure time behavio\*
122. MH "Screen Time"
123. small screen
124. MH Television OR Television AND tv
125. electronic media
126. MHvideo games
127. MHSocial Media
128. MH internet
129. "social media"
130. MH Smartphone
131. (MH "Computers, Hand-Held")
132. (MH "Cellular Phone")
133. (MH "Computers andComputerization")
134. (MH "Reading")
135. (MH "Writing")
136. ((reading or writing or studying) n3 time)

- 137. (MH "Automobile Driving")
- 138. driving n3 time
- 139. passive transportation
- 140. active n3 (travel\* or transport\*)
- 141. (MH "Cycling")
- 142. bicycl\* OR cycling
- 143. (MH "Exertion")
- 144. (MH "Energy Metabolism")
- 145. energy expenditure
- 146. sleep\* n3 (hour\* or duration or time or length or period or span)
- 147. MH sleep
- 148. S107ORS108ORS109ORS110ORS111ORS112ORS113ORS114ORS115ORS116ORS117ORS118ORS119ORS120ORS121ORS122ORS123ORS124ORS125ORS126ORS127ORS128ORS129ORS130ORS131ORS132ORS133ORS134ORS135ORS136ORS137ORS138ORS139ORS140ORS141ORS142ORS143ORS144ORS145ORS146ORS147
- 149. (MH "Developing Countries")
- 150. Africa or Asia or Caribbean or West Indies or South America or Latin America or Central America
- 151. TX (Afghanistan or Albania or Algeria or Angola or Antigua or Barbuda or Argentina or Armenia or Armenian or Aruba or Azerbaijan or Bahrain or Bangladesh or Barbados or Benin or Byelarus or Byelorussian or Belarus or Belorussian or Belorussia or Belize or Bhutan or Bolivia or Bosnia or Herzegovina or Hercegovina or Botswana or Brasil or Brazil or Bulgaria or Burkina Faso or Burkina Fasso or Upper Volta or Burundi or Urundi or Cambodia or Khmer Republic or Kampuchea or Cameroon or Cameroons or Cameron or Camerons or Cape Verde or Central African Republic or Chad or Chile or China or Colombia or Comoros or Comoro Islands or Comores or Mayotte or Congo or Zaire or Costa Rica or Cote d'Ivoire or Ivory Coast or Croatia or Cuba or Cyprus or Czechoslovakia or Czech Republic or Slovakia or Slovak Republic or Djibouti or French Somaliland or Dominica or Dominican Republic or East Timor or East Timur or Timor Leste or Ecuador or Egypt or United Arab Republic or El Salvador or Eritrea or Estonia or Ethiopia or Fiji or Gabon or Gabonese Republic or Gambia or Gaza or Georgia Republic or Georgian Republic or Ghana or Gold Coast or Greece or Grenada or Guatemala or Guinea or Guam or Guiana or Guyana or Haiti or Honduras or Hungary or India or Maldives or Indonesia or Iran or Iraq or Isle of Man or Jamaica or Jordan or Kazakhstan or Kazakh or Kenya or Kiribati or Korea or Kosovo or Kyrgyzstan or Kirghizia or Kyrgyz Republic or Kirghiz or Kirgizstan or Lao PDR or Laos or Latvia or Lebanon or Lesotho or Basutoland or Liberia or Libya or Lithuania or Macedonia or Madagascar or Malagasy Republic or Malaysia or Malaya or Malay or Sabah or Sarawak or Malawi or Nyasaland or Mali or Malta or Marshall Islands or Mauritania or Mauritius or Agalega Islands or Mexico or Micronesia or Middle East or Moldova or Moldovia or Moldovian or Mongolia or Montenegro or Morocco or Ifni or Mozambique or Myanmar or Myanma or Burma or Namibia or Nepal or Netherlands Antilles or New Caledonia or Nicaragua or Niger or Nigeria or Northern Mariana Islands or Oman or Muscat or Pakistan or Palau or Palestine or Panama or Paraguay or Peru or Philippines or Philipines or Phillipines or Phillippines or Poland or Portugal or Puerto Rico or Romania or Rumania or Roumania or Russia or Russian or Rwanda or Ruanda or Saint Kitts or St Kitts or Nevis or Saint Lucia or St Lucia or Saint Vincent or St Vincent or Grenadines or Samoa or Samoan Islands or Navigator Island or Navigator Islands or Sao Tome or Saudi Arabia or Senegal or Serbia or Montenegro or Seychelles or Sierra Leone or Slovenia or Sri Lanka or Ceylon or Solomon Islands or Somalia or South Africa or Sudan or Suriname or Surinam or Swaziland or Syria or Tajikistan or Tadjhikistan or Tadjikistan or Tadjhik or Tanzania or Thailand or Togo or Togolese Republic or Tonga or Trinidad or Tobago or Tunisia or Turkey or Turkmenistan or

Turkmen or Uganda or Ukraine or Uruguay or USSR or Soviet Union or Union of Soviet Socialist Republics or Uzbekistan or Uzbek or Vanuatu or New Hebrides or Venezuela or Vietnam or Viet Nam or West Bank or Yemen or Yugoslavia or Zambia or Zimbabwe or Rhodesia)

152. ((developing or less\* developed or under developed or underdeveloped or middle income or low\* income or underserved or under served or deprived or poor\*) n1 (countr\* or nation? or population? Or world))

153. ((developing or less\* developed or under developed or underdeveloped or middle income or low\* income) n1 (economy or economies))

154. (low\* n1 (gdp or gnp or gross domestic or gross national))

155. (low n3 middle n3 countr\*)

156. Imic or Imics or third world or lami countr\*

157. transitional countr\*

158. S149 OR S150 OR S151 OR S152 OR S153 OR S154 OR S155 OR S156 OR S157

159. S106 AND S148 AND S158

160. TI (child\* OR stepchild\* OR step-child\* OR kid OR kids OR girl OR girls OR boy OR boys OR teen\* OR youth\* OR youngster\* OR adolescent\* OR adolescence OR preschool\* OR preschool\* OR kindergarten\* OR school\* OR juvenile\* OR minors OR p?ediatric\* OR PICU) OR AB (child\* OR stepchild\* OR step-child\* OR kid OR kids OR girl OR girls OR boy OR boys OR teen\* OR youth\* OR youngster\* OR adolescent\* OR adolescence OR preschool\* OR preschool\* OR kindergarten\* OR school\* OR juvenile\* OR minors OR p?ediatric\* OR PICU) OR MH child+



**Appendix B: Full extraction of the variables used to measure physical behaviours**

| Reference                         | Variables used to describe behaviour(s)                                                                                                                                                                                                                                                                                                                                                                                 | Group-level summary data                                                                                                                                                                                                                                                                                                                                                                                                                                                                                                                                                                                                                                                                                                                                                                                                                   |
|-----------------------------------|-------------------------------------------------------------------------------------------------------------------------------------------------------------------------------------------------------------------------------------------------------------------------------------------------------------------------------------------------------------------------------------------------------------------------|--------------------------------------------------------------------------------------------------------------------------------------------------------------------------------------------------------------------------------------------------------------------------------------------------------------------------------------------------------------------------------------------------------------------------------------------------------------------------------------------------------------------------------------------------------------------------------------------------------------------------------------------------------------------------------------------------------------------------------------------------------------------------------------------------------------------------------------------|
| <b>Device-based measurement</b>   |                                                                                                                                                                                                                                                                                                                                                                                                                         |                                                                                                                                                                                                                                                                                                                                                                                                                                                                                                                                                                                                                                                                                                                                                                                                                                            |
| Amorim (2014) <sup>66</sup>       | Step count; Distance walked; Time spent walking                                                                                                                                                                                                                                                                                                                                                                         | Step count (6,251.0 ± 2,422.8 steps/day); Distance walked (3.9 ± 1.9 km/day); Time spent walking (68.5 ± 25.8 min/day)                                                                                                                                                                                                                                                                                                                                                                                                                                                                                                                                                                                                                                                                                                                     |
| Borges (2012) <sup>68</sup>       | Total inactive time; Lying; Sitting; Total active time; Standing; Walking; Others; Steps/day                                                                                                                                                                                                                                                                                                                            | Total inactive time (69.6±16.1%); Lying (30.7±20.2%); Sitting (38.9±17.6%); Total active time (30.4±16.1%); Standing (22.7±14.0%); Walking (6.1±4.4%); Others (1.6±0.9%); Steps/day (3575±2799)                                                                                                                                                                                                                                                                                                                                                                                                                                                                                                                                                                                                                                            |
| Cani (2019) <sup>70</sup>         | Time spent standing, Sitting time, Lying time, Walking time; Movement intensity during walking; Energy Expenditure; Number of steps; Active physical activities (standing+walking); Sedentary physical activities (sitting+lying); Time in sedentary physical activities <1.5METs; Time in physical activities ≥3METs; Sedentary (>=8.5hrs sedentary); Active (>=80 min MVPA); Severe physical inactivity (<4580 steps) | Time spent standing (DOT:139±64.3; CG:149±60.9min/day), Sitting time (DOT: 418±104; CG: 390±111min/day), Lying time (DOT: 114±81.6; CG: 103±85.4min/day), Walking time (DOT: 36.1±23.7; CG: 90.7±39.6min/day); Movement intensity during walking (DOT: 1.53±0.22; CG: 1.88±1.01m/s <sup>2</sup> ); Energy Expenditure (DOT: 1098±225; CG: 1184±225kcal/day); Number of steps (DOT: 2669±1883; CG: 4599±2308 steps/day); Active physical activities (DOT: 187±77.9; CG: 258±91.4min/day); Sedentary physical activities (DOT: 533±77.8; CG: 494±83.1min/day); Time in sedentary physical activities <1.5METs (DOT:623±63.7; CG: 598±50.0min/day); Time in physical activities ≥3METs (DOT: 47.8±29.6; CG: 75.0±28.5min/day); Sedentary (DOT: 96.4%, CG: 93.3%)Active (DOT: 14.3%; CG: 33.3%); Severe physical activity (DOT: 82.8%, CG:60%) |
| Chanthivech (2017) <sup>118</sup> | Step count                                                                                                                                                                                                                                                                                                                                                                                                              | Not provided                                                                                                                                                                                                                                                                                                                                                                                                                                                                                                                                                                                                                                                                                                                                                                                                                               |
| Coelho (2018) <sup>73</sup>       | Step count                                                                                                                                                                                                                                                                                                                                                                                                              | 7490.3±3330.2 steps/day                                                                                                                                                                                                                                                                                                                                                                                                                                                                                                                                                                                                                                                                                                                                                                                                                    |

|                              |                                                                                                       |                                                                                                                                                                                                                                                                                                                                                |
|------------------------------|-------------------------------------------------------------------------------------------------------|------------------------------------------------------------------------------------------------------------------------------------------------------------------------------------------------------------------------------------------------------------------------------------------------------------------------------------------------|
| Coelho (2018) <sup>74</sup>  | Daily steps                                                                                           | PED: 7295±3241; CON: 6998±3490 steps/day                                                                                                                                                                                                                                                                                                       |
| Felcar (2018) <sup>77</sup>  | Steps per day; Energy expenditure (kcal)                                                              | LG: 5891±3054 steps/day, 210.7±115.5kcal/day; WG: 6101±3591 steps/day, 219.2±126.2kcal/day                                                                                                                                                                                                                                                     |
| Fonesca (2016) <sup>79</sup> | Lying time; Sitting time; Standing time; Walking time; Movement intensity                             | Lying time (76[0-143.5]min/day); Sitting time (394.9±93.6min/day); Standing time (130.0[112.0-163.5]min/day); Walking time (68.0[57.5-87.0]min/day); Movement intensity (1.81±0.30m/s <sup>2</sup> )                                                                                                                                           |
| Freitas (2018) <sup>80</sup> | Steps per day; Light intensity PA; MVPA; Sedentary time; 10000 steps; sleep latency; sleep efficiency | Steps per day (WL+S: 7764±2176; WL+E: 7306±2304); Light intensity PA (WL+S: 369.4±63.7; WL+E: 395.7±72.5min/day); MVPA (WL+S: 26.3±16.9; WL+E: 25.3±14.5; ALL: 25.6±15.2min/day); Sedentary time (WL+S: 489.5±143.4; WL+E: 488.9±84.2min/day); 10000 steps (WL+S: 17.4%; WL+E: 16.6%); sleep latency (FIGURE 4B); sleep efficiency (FIGURE 4D) |

|                                 |                                                                                                                                                                                                                                                                                                                                                                                                                                                                                                                                                                                                                                                                                                                                                                                                                 |                                                                                                                                                                                                                                                                                            |
|---------------------------------|-----------------------------------------------------------------------------------------------------------------------------------------------------------------------------------------------------------------------------------------------------------------------------------------------------------------------------------------------------------------------------------------------------------------------------------------------------------------------------------------------------------------------------------------------------------------------------------------------------------------------------------------------------------------------------------------------------------------------------------------------------------------------------------------------------------------|--------------------------------------------------------------------------------------------------------------------------------------------------------------------------------------------------------------------------------------------------------------------------------------------|
| Furlanetto (2016) <sup>81</sup> | Physically active or inactive based on three definitions: (1) Classification of 30 minutes based on age: the minimum recommendation is to achieve 30 minutes/day of physical activity at an intensity of at least 3.2 METs in patients $\geq 65$ years of age and 4 METs in patients $< 65$ according to the ACSM9; (2) Classification of 30 minutes regardless of age: the minimum recommendation is to achieve 30 minutes/day of physical activity at an intensity of at least 3 METs for all subjects according to the ACSM and AHA8,9; and (3) Classification of 80 minutes regardless of age: the minimum recommendation is to achieve 80 minutes/day of physical activity with an intensity of at least 3 METs. In the latter, the 10-minute blocks of physical activity without intervals ( $> 3$ METs). | Definition (1) 35% active; Definition (2) 56% active; Definition (3) 27% active                                                                                                                                                                                                            |
| Furlanetto (2017) <sup>82</sup> | MVPA (hours/day); Sitting time (hours/day); Lying time (hours/day); Lying+Sitting time (hours/day); Sedentary $< 1.5$ MET (hours/day); Sedentary $< 2$ MET (hours/day); Average MET                                                                                                                                                                                                                                                                                                                                                                                                                                                                                                                                                                                                                             | MVPA (0.48 [0.14-1.24] hr/day); Sitting time (5.28 [3.95-6.52] hr/day); Lying time (1.72 [0.56-2.97] hr/day); Lying+Sitting time (7.52 [5.63-8.65] hr/day); Sedentary $< 1.5$ MET (8.21 [6.39-10.49] hr/day); Sedentary $< 2$ MET (9.33 [7.90-10.49] hr/day); Average MET (1.45 [1.2-1.8]) |
| Furlanetto (2017) <sup>83</sup> | Active time ( $> 2$ METs); MVPA time ( $> 3$ METs)                                                                                                                                                                                                                                                                                                                                                                                                                                                                                                                                                                                                                                                                                                                                                              | Active time (286 $\pm$ 26 min/day); MVPA time (89 $\pm$ 15 vs 84 $\pm$ 15 min/day during summer and winter, respectively)                                                                                                                                                                  |
| Genc (2012) <sup>57</sup>       | Kcal/12 hours                                                                                                                                                                                                                                                                                                                                                                                                                                                                                                                                                                                                                                                                                                                                                                                                   | 628.4 $\pm$ 238.9                                                                                                                                                                                                                                                                          |

|                                |                                                                                                                                                                                                                                                                                                                |                                                                                                                                                                                                                                                                                                                                                               |
|--------------------------------|----------------------------------------------------------------------------------------------------------------------------------------------------------------------------------------------------------------------------------------------------------------------------------------------------------------|---------------------------------------------------------------------------------------------------------------------------------------------------------------------------------------------------------------------------------------------------------------------------------------------------------------------------------------------------------------|
| Genc (2014) <sup>58</sup>      | Kcal/12hours                                                                                                                                                                                                                                                                                                   | 632.4±221.0                                                                                                                                                                                                                                                                                                                                                   |
| Gulart (2019) <sup>84</sup>    | Time sitting; Time lying; Time standing; Time walking; Steps; Time <1.5METs; Time ≥3METs; Severe inactivity (<4580 steps/day); Physical inactivity (<80min/day in activities ≥3METs)                                                                                                                           | Time sitting (383±104min/day); Time lying (105±105min/day); Time standing (140±54.9min/day); Time walking (68.5±38.2min/day); Steps (5273±2726 steps/day); Time <1.5METs (583±68.4min/day); Time ≥3METs (84.1±41.2min/day); Severe inactivity (not stated); Physical inactivity (not stated)                                                                  |
| Hernandes (2009) <sup>85</sup> | Time spent walking, standing, sitting or lying; intensity of the movement during walking                                                                                                                                                                                                                       | Time spent walking (55±33min/day; 7% of time), standing (36% of time), sitting (294±114min/day; 41% of time) or lying (15% of time); intensity of the movement during walking (1.9±0.4m/s <sup>2</sup> ); undefined activity/posture (1% of time)                                                                                                             |
| Karloh (2016) <sup>87</sup>    | Time sitting; Time lying; Time standing; Time walking; Number of steps; Movement intensity; Walking energy expenditure; Total energy expenditure                                                                                                                                                               | Time sitting (381[351-412]min/day); Time lying (77.1[53.3-101]min/day); Time standing (155[140-171]min/day); Time walking (81.1[68.1-94.0]min/day); Number of steps (6557[5496-7619] steps/day); Movement intensity (1.78[1.70-1.97]m/s <sup>2</sup> ); Walking energy expenditure (386[314-459]kcal/day); Total energy expenditure (1392[1283-1501]kcal/day) |
| Landal (2014) <sup>88</sup>    | Time spent walking, standing, sitting or lying; intensity of the movement during walking; total energy expenditure                                                                                                                                                                                             | Not provided                                                                                                                                                                                                                                                                                                                                                  |
| Lanza (2018) <sup>89</sup>     | Step count: Sedentary was considered when the NS walked less than 5.000 steps/day, low level of physical activity when between 5.000 and 7.499 steps/day, moderate level of daily physical activity when between 7.500 and 9.999 steps/day, and good daily activity when the NS was higher than 10.000 per day | Step count (8754[5534-11157]steps/day); 64% sedentary or low; 36% active                                                                                                                                                                                                                                                                                      |

|                               |                                                                                                                                                                                                                                                                                                                                                                        |                                                                                                                                                                                                                                                                                                                                                                                                                                                                                           |
|-------------------------------|------------------------------------------------------------------------------------------------------------------------------------------------------------------------------------------------------------------------------------------------------------------------------------------------------------------------------------------------------------------------|-------------------------------------------------------------------------------------------------------------------------------------------------------------------------------------------------------------------------------------------------------------------------------------------------------------------------------------------------------------------------------------------------------------------------------------------------------------------------------------------|
| Lopes (2019) <sup>90</sup>    | Steps per day                                                                                                                                                                                                                                                                                                                                                          | 4104±2439 steps/day                                                                                                                                                                                                                                                                                                                                                                                                                                                                       |
| Mantoani (2011) <sup>91</sup> | Walking time; Standing time; Movement intensity; TEE; EE>3METs; Active time >3METs; Time spent in sedentary activities (<3METs); Time spent in moderate activities (3-6METs); Time spent in vigorous activities (6-9METs)                                                                                                                                              | Walking time (51[34-73]min/day); Standing time (237[161-345]min/day); Movement intensity (1.9[1.6-2.1]m/s <sup>2</sup> ); TEE (1091[914-1389]kcal/day); EE>3METs (135[51-381]kcal/day); Active time >3METs (29[10-86]min/day); Time spent in sedentary activities (686[627-710]min/day); Time spent in moderate activities (31[12-77]min/day); Time spent in vigorous activities (0[0-9]min/day)                                                                                          |
| Monteiro (2012) <sup>92</sup> | time spent walking/day (TW, min/day), time spent per day in activities of at least moderate intensity (TPA, min/day), active (performed more than 30 min/day of TPA[moderate) and inactive (did not achieve this recommendation)                                                                                                                                       | Active (22/74), Inactive (52/74); TW (UW: 73 (31), NW: 69 (34), OW: 53 (30), OB: 46 (26); TPA (UW: 42 (43), NW: 31 (33); OW: 23 (36), OB: 11 (12)                                                                                                                                                                                                                                                                                                                                         |
| Morita (2018) <sup>93</sup>   | Time spent walking; Time spent standing; Time spent in lying; Time spent sitting; Time spent in combined sedentary postures                                                                                                                                                                                                                                            | Time spent walking (55[37-81]min/day); Time spent standing (209[147-276]min/day); Time spent in lying (107[25-183]min/day); Time spent sitting (317[248-386]min/day); Time spent in combined sedentary postures (443[341-514]min/day)                                                                                                                                                                                                                                                     |
| Munari (2018) <sup>94</sup>   | Time spent standing, sitting, lying, and walking; movement intensity during walking; energy expenditure in PADL; and number of steps; Active time (standing+walking); Sedentary time (sitting+lying); Sedentary (<1.5METs); MVPA (>=3METs); Inactivity (>=8.5hrs sedentary); Active (>=80 min MVPA); Inactive (<80 min MVPA); Severe physical inactivity (<4580 steps) | Time spent standing(149±62.4min/day), Sitting time (378±105min/day), Lying time (101±87.2min/day), Walking time (67.4±31.5min/day); Movement intensity during walking (1.72±0.27m/s <sup>2</sup> ); Energy expenditure in PADL (1264±298kcal/day); Number of steps (5292±3200); Active time (Figure 1); Sedentary time (Figure 1); Inactive (51.9%); Active (48.1%); Sedentary (21.8%); Not sedentary (78.2%); Severe physical inactivity (46.4%); Not severe physical inactivity (53.6%) |

|                             |                                                                                                                                     |                                                                                                                                                                                                                                                                                                                                                                                                                                                                                                                                                                                                                                                                                                     |
|-----------------------------|-------------------------------------------------------------------------------------------------------------------------------------|-----------------------------------------------------------------------------------------------------------------------------------------------------------------------------------------------------------------------------------------------------------------------------------------------------------------------------------------------------------------------------------------------------------------------------------------------------------------------------------------------------------------------------------------------------------------------------------------------------------------------------------------------------------------------------------------------------|
| Pitta (2009) <sup>98</sup>  | Walking time; Movement intensity; Standing time; Sitting time; Lying time                                                           | Walking time (56±32min/day); Movement intensity (1.9±0.4m/s <sup>2</sup> ); Standing time (246±122min/day); Sitting time (296±109min/day); Lying time (119±110min/day)                                                                                                                                                                                                                                                                                                                                                                                                                                                                                                                              |
| Probst (2011) <sup>99</sup> | Time spent walking, standing, sitting, lying; total energy expenditure; energy expenditure in >3METS; time in >3METS; steps per day | Calisthenics and Breathing Exercises Group (CBEG): Time spent walking (54±28min/day), Standing time (270±139min/day), Sitting time (283±121min/day), Lying time (108±100min/day); Total energy expenditure (1331±596kcal/day); Energy expenditure in >3METS (428±620kcal/day); Time in >3METS (4533±5968min/day); Steps per day (5002±4195steps/day). Endurance and Strength TrainingGroup (ESTG): Time spent walking (57±32min/day), Standing time (248±95min/day), Sitting time (296±91min/day), Lying time (113±101min/day); Total energy expenditure (1295±635kcal/day); Energy expenditure in >3METS (408±620kcal/day); Time in >3METS (4539±5314min/day); Steps per day (4568±3381steps/day). |
| Rocha (2017) <sup>101</sup> | Active time; number of steps; movement intensity; sedentary time                                                                    | Active time (228.12±105.80min/day); Number of steps (6388.12±3671.66 steps/day); Movement intensity (0.18±0.03m/s); Sedentary time (500.12 ± 128.76 min/day)                                                                                                                                                                                                                                                                                                                                                                                                                                                                                                                                        |
| Saglam (2013) <sup>61</sup> | Kcal/day                                                                                                                            | NW: Median 275.9kcal/day; OW/OB: Median 319.3kcal/day                                                                                                                                                                                                                                                                                                                                                                                                                                                                                                                                                                                                                                               |

|                                        |                                                                                                                                                                                                                                                                                                                     |                                                                                                                                                                                                                                                                                                                                                                                                                                                                                                                                                                                                                                                                                     |
|----------------------------------------|---------------------------------------------------------------------------------------------------------------------------------------------------------------------------------------------------------------------------------------------------------------------------------------------------------------------|-------------------------------------------------------------------------------------------------------------------------------------------------------------------------------------------------------------------------------------------------------------------------------------------------------------------------------------------------------------------------------------------------------------------------------------------------------------------------------------------------------------------------------------------------------------------------------------------------------------------------------------------------------------------------------------|
| Schneider (2018) <sup>103</sup>        | Total energy expenditure (TEE), energy expenditure during activity, number of steps, mean of metabolic equivalents, and the time spent in sedentary, moderate, vigorous and very vigorous                                                                                                                           | TEE (1261[1052-1514kcal]); Steps/day (6248[3756-8829]); Time lying down (37.2[12.9-62.0]min/day); Mean METs (1.7[1.3-1.9]); EEA>AGE (111[34.4-200.4kcal]); PAD>AGE (22[9-47min]); Sedentary Time AGE (698[673-711min]); Moderate time AGE (22[8.3-46.7min]); Vigorous time AGE (0.2[0-4.4min]); Very vigorous time AGE (0[0-0min]); EEA>3 (200[112.5-432kcal]); PAD>3 (49.3[25.9-101.4min]); INACT<3 (670.7[618.6-694.2min]); Moderate time >3 (49.3[25.7-100min]); Vigorous time >6 (0[0-1min]); Very vigorous time >9 (0[0-0min]); PAD>2 (13740[8057-17880kcal]); Sedentary time <2 (491[422-585.7min]); PAD>1.5 (296[211.9-358.3min]); Sedentary time <1.5 (424[361.7-507.3min]) |
| Vitorasso (2012) <sup>107</sup>        | Time spent walking; time spent in at least moderate PA; time spent standing; time spent sitting; ratio between time spent in moderate & time spent walking. Moderate defined as >4 METs for subjects aged from 40 to 64 years old; above 3.2 METs from 65 to 79 years and above 2 METs for subjects aged >80 years. | Time spent walking (53[36-80]); Time spent in at least moderate PA (12[3-33]); Time spent standing (196[137-289]); Time spent sitting (307[228-376]); 71% did not meet 30 minutes; Moderate/walking ratio (0.22[0.07-0.49])                                                                                                                                                                                                                                                                                                                                                                                                                                                         |
| Widyastuti (2017) <sup>117</sup>       | Daily steps                                                                                                                                                                                                                                                                                                         | Not provided                                                                                                                                                                                                                                                                                                                                                                                                                                                                                                                                                                                                                                                                        |
| Xavier (2016) <sup>108</sup>           | Step count                                                                                                                                                                                                                                                                                                          | Not provided                                                                                                                                                                                                                                                                                                                                                                                                                                                                                                                                                                                                                                                                        |
| Yilmaz (2016) <sup>63</sup>            | Steps per day; Walking duration (min/day)                                                                                                                                                                                                                                                                           | Steps per day: NW (2151[1338-2641]); OW (2487[1831-3065]); OB (2151[1931-2984]); Walking duration: NW (30[25-35]min/day); OW (30[25-35]min/day); OB (30[25-32]min/day)                                                                                                                                                                                                                                                                                                                                                                                                                                                                                                              |
| <b>Questionnaire-based measurement</b> |                                                                                                                                                                                                                                                                                                                     |                                                                                                                                                                                                                                                                                                                                                                                                                                                                                                                                                                                                                                                                                     |

|                                |                                                                                                                                                                                                         |                                                                                                                                                                                                                                                                                                                               |
|--------------------------------|---------------------------------------------------------------------------------------------------------------------------------------------------------------------------------------------------------|-------------------------------------------------------------------------------------------------------------------------------------------------------------------------------------------------------------------------------------------------------------------------------------------------------------------------------|
| Adetiloye (2018) <sup>43</sup> | Subjective sleep quality, sleep latency, sleep duration, sleep efficiency, sleep disturbances, use of sleep medication, daytime dysfunction; and global PSQI score                                      | Subjective sleep quality (1.52±0.85), sleep latency (1.85±0.86), sleep duration (2.07±0.82), sleep efficiency (1.93±1.06), sleep disturbances (1.23±0.43), use of sleep medication (0.48±0.83), daytime dysfunction (0.83±0.74); and global PSQI score (9.93±4.19). Poor sleep quality (81.7%) and Good sleep quality (18.3%) |
| Adewole (2017) <sup>44</sup>   | Sleep quality                                                                                                                                                                                           | 62.2% good sleep quality; 37.8% poor sleep quality                                                                                                                                                                                                                                                                            |
| Akinci (2013) <sup>56</sup>    | Subjective sleep quality, sleep latency, sleep duration, sleep efficiency, sleep disturbances, use of sleep medication, daytime dysfunction; and global PSQI score                                      | Subjective sleep quality (1.3±0.6), sleep latency (1.1±0.9), sleep duration (0.8±1.0), sleep efficiency (0.7±1.0), sleep disturbances (1.6±0.6), use of sleep medication (0.4±0.9), daytime dysfunction (1.2±0.8); and global PSQI score (7.1±3.9)                                                                            |
| Ali Zohal (2013) <sup>46</sup> | Poor sleep quality; PSQI score; Subjective sleep quality; Delay in initiation of sleep; Sleep duration; Sleep satisfaction; Sleep disturbance; Use of hypnotic drugs; Disturbance in daytime activities | Poor sleep quality (67.9%); PSQI score (8.03±3.66); Subjective sleep quality (1.9±0.8); Delay in initiation of sleep (1.3±0.5); Sleep duration (1.5±0.6); Sleep satisfaction (1.4±0.9); Sleep disturbance (2.1±1.1); Use of hypnotic drugs (2.2±0.7); Disturbance in daytime activities (1.9±0.9)                             |
| Athayde (2014) <sup>67</sup>   | Regular physical activity                                                                                                                                                                               | 29.2% Active, 70.8% Sedentary                                                                                                                                                                                                                                                                                                 |
| Borji (2018) <sup>47</sup>     | Sleep quality                                                                                                                                                                                           | Not provided                                                                                                                                                                                                                                                                                                                  |
| Campos (2017) <sup>69</sup>    | PSQI score; Poor sleep quality (absent/present)                                                                                                                                                         | PSQI score (9.9±4.6); Poor sleep quality (19.6% absent, 80.4% present)                                                                                                                                                                                                                                                        |



|                                 |                                                                                                                                                                                                                                                        |                                                                                                                                                                                                                                                                                                                                                                                                                                 |
|---------------------------------|--------------------------------------------------------------------------------------------------------------------------------------------------------------------------------------------------------------------------------------------------------|---------------------------------------------------------------------------------------------------------------------------------------------------------------------------------------------------------------------------------------------------------------------------------------------------------------------------------------------------------------------------------------------------------------------------------|
| Cavalcante (2012) <sup>71</sup> | Poor sleep quality                                                                                                                                                                                                                                     | 59.6% poor sleep quality                                                                                                                                                                                                                                                                                                                                                                                                        |
| Cetlin (2012) <sup>72</sup>     | Active; Inactive                                                                                                                                                                                                                                       | Active (97/200); Inactive (103/200)                                                                                                                                                                                                                                                                                                                                                                                             |
| Chegeni (2018) <sup>48</sup>    | Subjective sleep quality; Sleep latency; Sleep duration; Habitual sleep efficiency; Sleep disturbances; Use of sleep medication; Daytime dysfunction; Global PSQI score                                                                                | Subjective sleep quality (TG: 1.20±0.72, CG: 1.30±0.62); Sleep latency (TG: 1.60±1.26, CG: 1.80±1.08); Sleep duration (TG: 0.87±0.82, CG: 0.97±0.97); Habitual sleep efficiency (TG: 0.33±0.67, CG: 0.18±0.44); Sleep disturbances (TG: 1.51±0.50, CG: 1.32±0.47); Use of sleep medication (TG: 0.33±0.90, CG: 0.28±0.86); Daytime dysfunction (TG: 0.57±0.58, CG: 0.54±0.62); Global PSQI score (TG: 6.33±3.41, CG: 6.41±3.12) |
| Chunrong (2014) <sup>119</sup>  | PA score                                                                                                                                                                                                                                               | 5.05±1.89                                                                                                                                                                                                                                                                                                                                                                                                                       |
| da Costa (2012) <sup>75</sup>   | IPAQ score                                                                                                                                                                                                                                             | IPAQ Score (3.14±1.21), Active (N=4), Sedentary (N=1), Insufficiently active A (N=1), Insufficiently active B (N=1)                                                                                                                                                                                                                                                                                                             |
| Cukier (2020) <sup>76</sup>     | Low, Moderate, High physical activity                                                                                                                                                                                                                  | Low (39.3%), Moderate (22.1%), High (38.6%)                                                                                                                                                                                                                                                                                                                                                                                     |
| De (2012) <sup>111</sup>        | Poor sleep quality; PSQI global score; Time to fall asleep; Hours of sleep; Wake up at night or early morning (three or more times a week); Breathing difficulty or cough during night (three or more times a week); Sleep medicine use; Sleep quality | 100% poor sleep quality; PSQI global score (median 11); Time to fall asleep (median 20 mins); Hours of sleep (median 5); 67.5% had to wake up at night or early morning and 47.5% had either breathing difficulty or cough during night. Sleep medicine were never used by 90% and 77.5% rated their sleep quality during past month as very good or fairly good.                                                               |
| Desalu (2019) <sup>45</sup>     | Has asthma limited your... sleep quality?                                                                                                                                                                                                              | 44.2% experienced poor sleep                                                                                                                                                                                                                                                                                                                                                                                                    |

|                                  |                                                                                                                                                                                                                                          |                                                                                                                                                                                                                                                                                                                                             |
|----------------------------------|------------------------------------------------------------------------------------------------------------------------------------------------------------------------------------------------------------------------------------------|---------------------------------------------------------------------------------------------------------------------------------------------------------------------------------------------------------------------------------------------------------------------------------------------------------------------------------------------|
| Ding (2017) <sup>120</sup>       | JSEQ score; Trouble falling asleep; Wake up several times per night; Trouble staying asleep; Tired after sleep                                                                                                                           | JSEQ score (6.3±4.6); Trouble falling asleep (0:16.6%, 1:30.7%, 2:24.9%, 3:12.4%, 4:7.5%, 5:7.9%); Wake up several times per night (0:20.6%, 1:29.9%, 2:21.9%, 3:13.2%, 4:7.0%, 5:7.4%); Trouble staying asleep (0:27.1%, 1:24.4%, 2:24.6%, 3:10.7%, 4:6.8%, 5:6.4%); Tired after sleep (0:47.7%, 1:25.3%, 2:14.4%, 3:6.1%, 4:4.2%, 5:2.4%) |
| Eslaminejad (2017) <sup>49</sup> | Sleep quality, sleep latency, sleep duration, appropriate sleep, sleep disturbances, sleep medication, and impaired daily functioning                                                                                                    | 5.92% of women and 5.32% of men suffered from severe sleep problem; PSQI score not provided                                                                                                                                                                                                                                                 |
| Filippin (2011) <sup>78</sup>    | Physically active, physically inactive                                                                                                                                                                                                   | Physically active (58%); physically inactive (41%)                                                                                                                                                                                                                                                                                          |
| Gupta (2018) <sup>112</sup>      | Fixed sleep schedule; subjective sleep quality, sleep latency, sleep duration, habitual sleep efficiency, sleep disturbances, use of sleep medications, and daytime dysfunction, Poor sleep quality (overall PSQI score); Exercise score | Poor sleep quality (33.3%); Others not provided                                                                                                                                                                                                                                                                                             |
| Koyanagi (2017) <sup>127</sup>   | Meeting ≥150 minutes of MVPA/week (yes/no)                                                                                                                                                                                               | Not provided                                                                                                                                                                                                                                                                                                                                |
| Lopez Jove (2013) <sup>64</sup>  | Physically active                                                                                                                                                                                                                        | Not provided                                                                                                                                                                                                                                                                                                                                |
| Mahmood (2019) <sup>50</sup>     | Inactive; Moderately inactive; Moderately active; Active                                                                                                                                                                                 | Inactive (33.9%); Moderately inactive (30.4%); Moderately active (21.4%); Active (14.3%)                                                                                                                                                                                                                                                    |

|                               |                                                                                                                                                                                                                                                                                                                                                                                                                                                                                                                                        |                                                                                                                                                                                                                                                                                                          |
|-------------------------------|----------------------------------------------------------------------------------------------------------------------------------------------------------------------------------------------------------------------------------------------------------------------------------------------------------------------------------------------------------------------------------------------------------------------------------------------------------------------------------------------------------------------------------------|----------------------------------------------------------------------------------------------------------------------------------------------------------------------------------------------------------------------------------------------------------------------------------------------------------|
| Mihaltan (2019) <sup>53</sup> | Clinical Judgement Active (performing $\geq 150$ min/week of moderate to vigorous exercise, such as briskwalking); Insufficiently active (performing 1–149 min/week of moderate to vigorous exercise); Completely inactive (0 min/week of moderate to vigorous exercise); EVS Active, Insufficiently active, Completely inactive; YPAS Hours/week physical activity, Total mean energy expenditure, Mean summary index value, Vigorous index, Leisurely walking index, Moving index, Standing index, Sitting index, YPAS summary index | Not provided                                                                                                                                                                                                                                                                                             |
| Mihaltan (2019) <sup>54</sup> | Self-reported and clinically judged Active and Inactive; YPAS time in light activities; YPAS summary index                                                                                                                                                                                                                                                                                                                                                                                                                             | Self-reported vs. clinically judged active patients: BG 33.8% vs 44.3%, SB 31.2% vs 38.4%. Completely inactive patients as self-reported vs. clinically judged: BG 27.1% vs 12.4%, SB 30.8% vs 9.6%, respectively. YPAS light activities: BG 2.8, SB 3.4hrs/day. YPAS summary index: BG 41.0 and SB 43.9 |
| Molinas (2007) <sup>65</sup>  | Physically active defined as >30 continuous minutes at least once per week                                                                                                                                                                                                                                                                                                                                                                                                                                                             | 71.4% physically active                                                                                                                                                                                                                                                                                  |
| Moussa (2014) <sup>51</sup>   | Household, sporting, and leisure activities; total physical activity score                                                                                                                                                                                                                                                                                                                                                                                                                                                             | Household (0.88 $\pm$ 0.31), sporting (0.33 $\pm$ 0.54), and leisure activities (1.64 $\pm$ 0.58); total physical activity score (2.86 $\pm$ 0.78)                                                                                                                                                       |
| Moussa (2016) <sup>52</sup>   | Household, sporting, and leisure activities; total physical activity score                                                                                                                                                                                                                                                                                                                                                                                                                                                             | Household (0.88 $\pm$ 0.31), sporting (0.33 $\pm$ 0.54), and leisure activities (1.64 $\pm$ 0.58); total physical activity score (2.86 $\pm$ 0.78)                                                                                                                                                       |

|                                 |                                                                                                                                                                                        |                                                                                                                                                                                                                                                                              |
|---------------------------------|----------------------------------------------------------------------------------------------------------------------------------------------------------------------------------------|------------------------------------------------------------------------------------------------------------------------------------------------------------------------------------------------------------------------------------------------------------------------------|
| Nobeschi (2020) <sup>95</sup>   | Sleep quality, sleep latency, sleep duration, habitual sleep efficiency, sleep alterations, use of medications to sleep, and daytime sleep dysfunction; PSQI score; Poor sleep quality | Sleep quality (1[1-1]), sleep latency (1[0-2]), sleep duration (1[0-3]), habitual sleep efficiency (1[1-2]), sleep alterations (1[1-2]), use of medications to sleep (0[0-1]), and daytime sleep dysfunction (0[0-1]); PSQI score (6.5[4.75-8.75]); Poor sleep quality (73%) |
| Nunes (2008) <sup>96</sup>      | Global PSQI score and in-out of bed time                                                                                                                                               | Melatonin: PSQI 7.75±4.0; in-bed time 22.65±0.94 hours; out-of-bed time 5.25±0.82 and Placebo: PSQI 6.38±3.0; in-bed time 22.20±1.05 hours; out-of-bed time 5.43±1.37; and 9/25 Good Sleepers                                                                                |
| Panigrahi (2018) <sup>113</sup> | PSQI score                                                                                                                                                                             | PSQI score (4 [3-7]); 48.5% poor sleep quality                                                                                                                                                                                                                               |
| Pehlivan (2019) <sup>59</sup>   | Vigorous PA (kcal/day); Moderate PA (kcal/day); Walking (kcal/day); Total PA (kcal/day)                                                                                                | Vigorous PA (25.26 [0-480]); Moderate PA (132 [0-840]); Walking (146 [0-693]); Total PA (304 [0-1533])                                                                                                                                                                       |
| Poongadan (2016) <sup>114</sup> | Sports activity (hours/day); TV watching/video games (hours/day); Duration of Sleep (hours/day)                                                                                        | Not presented for adults                                                                                                                                                                                                                                                     |
| Reboredo (2017) <sup>100</sup>  | Inactive or insufficiently active                                                                                                                                                      | 123/166 Inactive or insufficiently active                                                                                                                                                                                                                                    |
| Rodrigues (2014) <sup>102</sup> | Sedentary, insufficiently active, active and very active                                                                                                                               | Not provided                                                                                                                                                                                                                                                                 |
| Sahin (2015) <sup>60</sup>      | Sleep quality, sleep latency, sleep duration, sleep efficiency, sleep disturbances, use of sleep medication, and daytime dysfunction; global PSQI score                                | Sleep quality (2.04±0.52), sleep latency (2.89±1.78), sleep duration (2.47±1.54), sleep efficiency (1.78±0.48), sleep disturbances (1.89±0.86), use of sleep medication (0.00), and daytime dysfunction (2.45±1.35); global PSQI score (9.52±0.22)                           |
| Sharma (2019) <sup>115</sup>    | Physical exercise in leisure (mBQ PEL); leisure and locomotion activities (mBQ LLA); and total score (mBQ TOT)                                                                         | Physical exercise in leisure (NoDep: 2.28±0.38; Dep: 1.86±0.3); leisure and locomotion activities (NoDep: 2.8±0.36; Dep: 2.07±0.36); and total score (NoDep: 5.09±0.42; Dep: 3.92±0.54)                                                                                      |

|                                   |                                                                                                                                                                                           |                                                                                                                                                                                                                                                                                                        |
|-----------------------------------|-------------------------------------------------------------------------------------------------------------------------------------------------------------------------------------------|--------------------------------------------------------------------------------------------------------------------------------------------------------------------------------------------------------------------------------------------------------------------------------------------------------|
| Silva (2011) <sup>104</sup>       | Total activity (metabolic equivalent intensity min/week)                                                                                                                                  | Total activity (857 [0-3493])                                                                                                                                                                                                                                                                          |
| Simon (2009) <sup>105</sup>       | Physically active (Yes/No)                                                                                                                                                                | Physically active (N=15), Physically inactive (N=23)                                                                                                                                                                                                                                                   |
| Tavares (2017) <sup>106</sup>     | Physical activity (Yes/No)                                                                                                                                                                | Yes (33.3%), No (66.7%)                                                                                                                                                                                                                                                                                |
| Turan (2016) <sup>62</sup>        | IPAQ score                                                                                                                                                                                | IPAQ score (ED: 3880.8413±1845.28343; NoED: 8516.0333±3324.99668 METmin/week)                                                                                                                                                                                                                          |
| Ulfathinah (2019) <sup>116</sup>  | Global PSQI score; Subjective sleep quality; Sleep latency; Sleep duration; Habitual sleep efficiency; Sleep disturbances; Use of sleeping medication; Daytime dysfunction; Sleep quality | Global PSQI score (median 6); Subjective sleep quality (median 1); Sleep latency (median 1); Sleep duration (median 2); Habitual sleep efficiency (median 0); Sleep disturbances (median 1); Use of sleeping medication (median 0); Daytime dysfunction (median 1); Sleep quality (66% poor, 34% good) |
| Vancampfort (2017) <sup>126</sup> | ≥150 min were classified as meeting the recommended guidelines and those scoring <150 min (low physical activity) were classified as not meeting the recommended guidelines               | Country level data not presented                                                                                                                                                                                                                                                                       |
| Vancampfort (2017) <sup>130</sup> | ≥150 min were classified as meeting the recommended guidelines and those scoring <150 min (low physical activity) were classified as not meeting the recommended guidelines               | Not provided                                                                                                                                                                                                                                                                                           |
| Vancampfort (2017) <sup>128</sup> | Time in sedentary behaviour (<8 hours/>=8 hours)                                                                                                                                          | Not provided                                                                                                                                                                                                                                                                                           |

|                                   |                                                                                                                                                                                                                                                                                         |                                                                                                                  |
|-----------------------------------|-----------------------------------------------------------------------------------------------------------------------------------------------------------------------------------------------------------------------------------------------------------------------------------------|------------------------------------------------------------------------------------------------------------------|
| Vancampfort (2018) <sup>131</sup> | Time spent sitting or reclining (SB) in total including at work, at home, getting to and from places, or with friends (sitting at a desk, sitting with friends, travelling in car, bus, train, reading, playing cards or watching television); $\geq 8$ hours/day SB (highly sedentary) | Not provided                                                                                                     |
| Vancampfort (2018) <sup>129</sup> | Meeting $\geq 150$ minutes of MVPA/week (yes/no)                                                                                                                                                                                                                                        | Not provided                                                                                                     |
| Vukoja (2018) <sup>55</sup>       | PSQI score; Sleep quality                                                                                                                                                                                                                                                               | Asthma $4.9 \pm 3.9$ , 40.4% poor sleep quality; COPD $5.8 \pm 4.3$ , 38% poor sleep quality                     |
| Wang (2016) <sup>122</sup>        | Physical activity per day: never; less than 30 minutes; and more than 30 minutes                                                                                                                                                                                                        | 48.0% Never; 9.1% $< 30$ mins; 42.9% $\geq 30$ mins                                                              |
| Wang (2016) <sup>123</sup>        | Physical activity per day: never; less than 30 minutes; and more than 30 minutes                                                                                                                                                                                                        | 39% Never, 6% $< 30$ min, 55% $\geq 30$ min                                                                      |
| Wang (2017) <sup>124</sup>        | Total sleep time; Short sleep: $< 7$ h/day; Medium sleep: 7–8 h/day; Long sleep: $> 8$ h/day                                                                                                                                                                                            | Total sleep time (not stated); Short sleepers (N=164/334); Medium sleepers (N=111/334); Long sleepers (N=59/334) |
| Yunus (2018) <sup>109</sup>       | Total sleep time ( $< 7$ hours, 7–9 hours, and $> 9$ hours according to National Sleep Foundation (2015) guidelines)                                                                                                                                                                    | $< 7$ hours (N=32/116), 7–9 hours (N=74/116), and $> 9$ hours (N=10/116)                                         |
| Zheng (2019) <sup>125</sup>       | PSQI score                                                                                                                                                                                                                                                                              | Intervention group: $9.50 \pm 2.87$ ; Control group: $9.31 \pm 2.98$                                             |

| <b>Device and questionnaire-based measurements</b> |                                                                                                                                                                                                              |                                                                                                                                                                                                                                                                                                                               |
|----------------------------------------------------|--------------------------------------------------------------------------------------------------------------------------------------------------------------------------------------------------------------|-------------------------------------------------------------------------------------------------------------------------------------------------------------------------------------------------------------------------------------------------------------------------------------------------------------------------------|
| Jardim (2011) <sup>86</sup>                        | Daily steps                                                                                                                                                                                                  | 8064±4343; IPAQ data not provided                                                                                                                                                                                                                                                                                             |
| Nyssen (2013) <sup>97</sup>                        | Steps per day; Severe physical inactivity (<4580 steps/day); Household domain; Sports domain; Leisure domain; Total activity; MET-min/wk of Walking; MET-min/wk of MPA; MET-min/wk of VPA; MET-min/wk of TPA | Steps per day (4227±2075); Severe physical inactivity (50%); Household domain (1.1[0.6-1.7]); Sports domain (1.4[0.0-4.1]); Leisure domain (1.2[1.0-2.9]); Total (5.3[2.5-7.2]); MET-min/wk of Walking (231.0[0.0-358.8]); MET-min/wk of MPA (160[0-510]); MET-min/wk of VPA (0[0-0]); MET-min/wk of TPA (338.2[153.0-979.5]) |
| Tao (2016) <sup>121</sup>                          | IPAQ score (MET-min); Walking steps per week; Energy expenditure (kcal/weight); PASE-C score                                                                                                                 | IPAQ score (23.30[10.00-36.57]); Walking steps (23788[13545-34872]); Energy expenditure (980.6[464.8-1522.0]); PASE-C (73.25±49.47)                                                                                                                                                                                           |
| <b>Not provided</b>                                |                                                                                                                                                                                                              |                                                                                                                                                                                                                                                                                                                               |
| Bhuker (2012) <sup>110</sup>                       | Not provided                                                                                                                                                                                                 | Not provided                                                                                                                                                                                                                                                                                                                  |

### Appendix C: Reference list of included studies

43. Adetiloye AO, Erhabor GE, Adewole OO, Awopeju O. The determinants of sleep quality and its impact on exercise capacity of patients with COPD. *Afr J Respir Med*. 2018;13(2):10-4.
44. Adewole O, Erhabor G, Oguntola O. Sleep pattern, quality and sleepiness among patients with chronic pulmonary parenchyma disease in Nigeria. *Sleep Med*. 2011;12:S47.
45. Desalu OO, Onyedum CC, Makusidi MA, Adeoti AO, Sanya EO, Fadare JO, et al. Physical and socioeconomic impact of asthma in Nigeria: Experience of patients attending three tertiary hospitals. *Niger J Clin Pract*. 2019;22(6):855-61.
46. Ali Zohal M, Yazdi Z, Kazemifar AM. Daytime sleepiness and quality of sleep in patients with COPD compared to control group. *Glob J Health Sci*. 2013;5(3):150-5.
47. Borji M, Salimi E. Comparing the effect of home care nursing and health promotion model on quality of life, sleep quality and life style of patients with asthma: A randomized clinical trial. *Iran J Allergy Asthma Immunol*. 2018;17(1):150.
48. Chegeni SP, Gholami M, Azargoon A, Hossein Pour AH, Birjandi M, Norollahi H. The effect of progressive muscle relaxation on the management of fatigue and quality of sleep in patients with chronic obstructive pulmonary disease: A randomized controlled clinical trial. *COMPLEMENT THER CLIN PRACT*. 2018;31:64-70.
49. Eslaminejad A, Safa M, Ghassem BF, Hajizadeh F, Pashm FM. Relationship between sleep quality and mental health according to demographics of 850 patients with chronic obstructive pulmonary disease. *J HEALTH PSYCHOL*. 2017;22(12):1603-13.
50. Mahmood ZA, Malghooth ZT. Relationship of hips and knees osteoarthritis with bronchial asthma. *Res J Pharm , Biol Chem Sci*. 2019;10(2):64-70.
51. Moussa SB, Sfaxi I, Tabka Z, Saad HB, Rouatbi S. Oxidative stress and lung function profiles of male smokers free from COPD compared to those with COPD: a case-control study. *Libyan J Med*. 2014;9(1):23873.
52. Moussa SB, Rouatbi S, Saad HB. Incapacity, Handicap, and Oxidative Stress Markers of Male Smokers With and Without COPD. *Respir Care*. 2016;61(5):668-79.
53. Mihaltan F, Adir Y, Antczak A, Porpodis K, Radulovic V, Pires N, et al. Importance of the relationship between symptoms and self-reported physical activity level in stable COPD based on the results from the SPACE study. *RESPIR RES*. 2019;20(1):N.PAG.
54. Mihaltan F, Antczak A, Radulovic V, Chen Y, Alecu S. PHYSICAL ACTIVITY LEVEL IN STABLE COPD PATIENTS FROM CENTRAL EASTERN EUROPE: RESULTS FROM A LARGE OBSERVATIONAL STUDY. *Chest*. 2019;156(4):A903.
55. Vukoja M, Kopitovic I, Milicic D, Maksimovic O, Pavlovic-Popovic Z, Ilic M. Sleep quality and daytime sleepiness in patients with COPD and asthma. *Clin Respir J*. 2018;12(2):398-403.
56. Akinci AC, Yildirim E. Factors affecting health status in patients with chronic obstructive pulmonary disease. *International Journal of Nursing Practice*. 2013;19(1):31-8.
57. Genc A, Ucok K, Gunay E, Gonul Y, Karabacak H, Sener U, et al. Effects of long-acting beta-2 agonist treatment on daily energy balance and body composition in patients with chronic obstructive pulmonary disease. *Turk J Med Sci*. 2012;42:1414-22.
58. Genc A, Ucok K, Sener U, Koyuncu T, Akar O, Celik S, et al. Association analyses of oxidative stress, aerobic capacity, daily physical activity, and body composition parameters in patients with mild to moderate COPD. *TURK J MED SCI*. 2014;44(6):972-9.
59. Pehlivan E, Niksarlioglu EY, Balci A, Kilic L. The effect of pulmonary rehabilitation on the physical activity level and general clinical status of patients with bronchiectasis. *Turk Thorac J*. 2019;20(1):30-5.
60. Şahin AZ, Dayapoğlu N. Effect of progressive relaxation exercises on fatigue and sleep quality in patients with chronic obstructive lung disease (COPD). *COMPLEMENT THER CLIN PRACT*. 2015;21(4):277-81.
61. Sağlam M, Savci S, Vardar Yagli N, Calik Kutukcu E, Arikan H, Inal Ince D, et al. Relationship between obesity and respiratory muscle strength, functional capacity, and physical activity level in patients with chronic obstructive pulmonary disease. *Fiz Rehab*. 2013;24(3):157-62.
62. Turan O, Ure I, Turan PA. Erectile dysfunction in COPD patients. *Chronic Respir Dis*. 2016;13(1):5-12.
63. Yilmaz FT, Aydin HT. The effect of a regular walking program on dyspnoea severity and quality of life in normal weight, overweight, and obese patients with chronic obstructive pulmonary disease. *International Journal of Nursing Practice*. 2018;24(3):1.
64. Lopez Jove OR, Galdames A, Barrionuevo V, Giugno E, Rey S, Wu YF, et al. Depression in patients with chronic obstructive pulmonary disease (COPD): Relationship to dyspnea degrees



- and impact on quality of life (QOL). *Am J Respir Crit Care Med.* 2013;187.
65. Molinas JA, Torrent C, Arduzzo LR, Crisci CD, Barayazarra S, Crisci S. Relación entre índice de masa corporal y severidad del asma bronquial en adultos. *Arch alerg inmunol clin.* 2007;38(1):19-28.
  66. Amorim PB, Stelmach R, Carvalho CRF, Fernandes FLA, Carvalho-Pinto R, Cukier A. Barriers associated with reduced physical activity in COPD patients. *J bras pneumol.* 2014;40(5):504-12.
  67. Athayde FTS, Vieira DSR, Britto RR, Parreira VF. Functional outcomes in patients with chronic obstructive pulmonary disease: a multivariate analysis. *REV BRASIL FISIOTER.* 2014 Jan;18(1):63-71.
  68. Borges RC, Carvalho CRF. Physical activity in daily life in Brazilian COPD patients during and after exacerbation. *COPD.* 2012;9(6):596-602.
  69. Campos FL, de Bruin, PFC, Pinto TF, da Silva, FGC, Pereira EDB, de Bruin, VMS. Depressive symptoms, quality of sleep, and disease control in women with asthma. *Sleep Breathing.* 2017;21(2):361-7.
  70. Cani KC, Matte DL, Silva, Isabela JCS, Gulart AA, Karloh M, Mayer AF. Impact of Home Oxygen Therapy on the Level of Physical Activities in Daily Life in Subjects With COPD. *Respir Care.* 2019;64(11):1392-400.
  71. Cavalcante AM, De Bruin, VMS., Pereira EDB, Cavalcante MM, Nunes DM, Viana CS, et al. Restless leg syndrome, fatigue and quality of sleep in chronic obstructive pulmonary disease. *Am J Respir Crit Care Med.* 2012;185.
  72. Cetlin AA, Gutierrez MR, Bettiol H, Barbieri MA, Vianna EO. Influence of asthma definition on the asthma-obesity relationship. *BMC Public Health.* 2012;12:844.
  73. Coelho CM, Campos LA, Pereira FO, Cardoso RM, Nascimento LM, Oliveira JBL, et al. Objectively measured daily-life physical activity of moderate-to-severe Brazilian asthmatic women in comparison to healthy controls: A cross-sectional study. *J Asthma.* 2018;55(1):73-8.
  74. Coelho CM, Reboredo MM, Valle FM, Malaguti C, Campos LA, Nascimento LM, et al. Effects of an unsupervised pedometer-based physical activity program on daily steps of adults with moderate to severe asthma: a randomized controlled trial. *J Sports Sci.* 2018;36(10):1186-93.
  75. Da Costa CC, Bordin CD, Roberto CJ P, Lermen C, Colombo C, Machado DSR. AS REPERCUSSÕES DE UM PROGRAMA DE REABILITAÇÃO PULMONAR NO NÍVEL DE ATIVIDADE FÍSICA EM PACIENTES COM DOENÇA PULMONAR OBSTRUTIVA CRÔNICA. *REV INSPIRAR MOVIMENTO SAUDE.* 2012;4(5):34-7.
  76. Cukier A, Godoy I, Costa CHD, Rubin AS, Gregorio MG, Albuquerque Neto AA, et al. Symptom variability over the course of the day in patients with stable COPD in Brazil: a real-world observational study. *J Bras Pneumol.* 2020;46(3):e20190223.
  77. Felcar JM, Probst VS, de Carvalho DR, Merli MF, Mesquita R, Vidotto LS, et al. Effects of exercise training in water and on land in patients with COPD: a randomised clinical trial. *Physiotherapy.* 2018;104(4):408-16.
  78. Filippin TR, Ariza D, Beloto, Ana-Carolina NDO. Correlation of the bod mortality predictor index in physically active and sedentary chronic obstructive pulmonary diseased patients. *REV INSPIRAR MOVIMENTO SAUDE.* 2011;3(4):30-5.
  79. Fonseca FR, Karloh M, de Araujo, CLP., dos Santos K, Mayer AF. Nutritional status and its relationship with different dimensions of functional status in patients with chronic obstructive pulmonary disease. *Rev Nutr.* 2016;29(5):635-44.
  80. Freitas PD, Silva AG, Ferreira PG, Carvalho CRF, Da Silva A, Salge JM, et al. Exercise Improves Physical Activity and Comorbidities in Obese Adults with Asthma. *Med Sci Sports Exerc.* 2018;50(7):1367-76.
  81. Furlanetto KC, Pinto IFS, Sant'Anna T, Hernandez NA, Pitta F. Profile of patients with chronic obstructive pulmonary disease classified as physically active and inactive according to different thresholds of physical activity in daily life. *Braz J Phys Ther.* 2016;20(6):517-24.
  82. Furlanetto KC, Donária L, Schneider LP, Lopes JR, Ribeiro M, Fernandes KBP, et al. Sedentary Behavior Is an Independent Predictor of Mortality in Subjects With COPD. *Respir Care.* 2017;62(5):579-87.
  83. Furlanetto KC, Demeyer H, Sant'anna T, Hernandez NA, Camillo CA, Pons IS, et al. Physical Activity of Patients with COPD from Regions with Different Climatic Variations. *COPD.* 2017;14(3):276-83.
  84. Gulart AA, Munari AB, Klein SR, Venancio RS, Alexandre HF, Mayer AF. The London Chest Activity of Daily Living scale cut-off point to discriminate functional status in patients with chronic obstructive pulmonary disease. *Braz J Phys Ther.* 2019.
  85. Hernandez NA, Teixeira DC, Probst VS, Brunetto AF, Ramos EMC, Pitta F. Profile of the level

- of physical activity in the daily lives of patients with COPD in Brazil. *J Bras Pneumol*. 2009;35(10):949-56.
86. Jardim JR, Piazza M, Carvalho AK, Ivanaga IT, Nascimento OA. Assessment of physical activity by pedometer in patients with chronic obstructive pulmonary disease (COPD) In an emerging country. *Am J Respir Crit Care Med*. 2011;183(1).
  87. Karloh M, Araujo CLP, Gulart AA, Reis CM, Steidle LJM, Mayer AF. The Glittre-ADL test reflects functional performance measured by physical activities of daily living in patients with chronic obstructive pulmonary disease. *Braz J Phys Ther*. 2016;20(3):223-30.
  88. Landal AC, Monteiro F, Hevely BC, Kanesawa LM, Hernandes N, Pitta F. Fatores associados à melhora da composição corporal em indivíduos com DPOC após treinamento físico. *Fisioter mov*. 2014;27(4):633-41.
  89. Lanza FC, Castro RAS, de Camargo A,A., Zanatta DJM, Rached S, Athanzio R, et al. COPD Assessment Test (CAT) is a Valid and Simple Tool to Measure the Impact of Bronchiectasis on Affected Patients. *COPD*. 2018;15(5):512-9.
  90. Lopes AC, Xavier RF, AC Pereira A,Carolina, Stelmach R, Fernandes FLA, Harrison SL, et al. Identifying COPD patients at risk for worse symptoms, HRQoL, and self-efficacy: A cluster analysis. *CHRONIC ILLN*. 2019;15(2):138-48.
  91. Mantoani LC, Hernandes N, Guimarães M,M., Vitorasso RL, Probst VS, Pitta F. Does the BODE index reflect the level of physical activity in daily life in patients with COPD? *Braz j phys ther (Impr)*. 2011;15(2):131-7.
  92. Monteiro F, Camillo CA, Vitorasso R, Sant'Anna T, Hernandes NA, Probst VS, et al. Obesity and physical activity in the daily life of patients with COPD. *Lung*. 2012 Aug;190(4):403-10.
  93. Morita AA, Silva LKO, Bisca GW, Oliveira JM, Hernandes NA, Pitta F, et al. Heart Rate Recovery, Physical Activity Level, and Functional Status in Subjects With COPD. *Respir Care*. 2018;63(8):1002-8.
  94. Munari AB, Gulart AA, dos Santos K, Venâncio RS, Karloh M, Mayer AF. Modified Medical Research Council Dyspnea Scale in GOLD Classification Better Reflects Physical Activities of Daily Living. *Respir Care*. 2018;63(1):77-85.
  95. Nobeschi L, Zangirolami-Raimundo J, Cordoni PK, Squassoni SD, Fiss E, Pérez-Riera AR, et al. Evaluation of sleep quality and daytime somnolence in patients with chronic obstructive pulmonary disease in pulmonary rehabilitation. *BMC PULM MED*. 2020;20(1):1-7.
  96. Nunes DM, Mota RMS, Machado MO, Pereira EDB, de Bruin VMS, de Bruin PFC. Effect of melatonin administration on subjective sleep quality in chronic obstructive pulmonary disease. *Braz J Med Biol Res*. 2008;41(10):926-31.
  97. Nyssen SM, Santos JGd, Barusso MS, Oliveira Junior A,Delfino de, Lorenzo, Valeria Amorim Pires Di, Jamami M. Levels of physical activity and predictors of mortality in COPD. *J bras pneumol*. 2013;39(6):659-66.
  98. Pitta F, Breyer M-, Hernandes NA, Teixeira D, Sant'Anna TJP, Fontana AD, et al. Comparison of daily physical activity between COPD patients from Central Europe and South America. *Respir Med*. 2009;103(3):421-6.
  99. Probst VS, Kovelis D, Hernandes N, Camillo CA, Cavalheri V, Pitta F. Effects of 2 Exercise Training Programs on Physical Activity in Daily Life in Patients With COPD. *Respir Care*. 2011;56(11):1799-807.
  100. Reboredo MDM, Lucinda LM, Yecker GD, Brega DR, Pires JS, Oliveira LA, et al. Barriers to physical activity in patients with chronic respiratory diseases. *Am J Respir Crit Care Med*. 2018;197.
  101. Rocha FR, Brüggemann A, Karla V, Francisco DDS, Medeiros CSD, Rosal D, Paulin E. Diaphragmatic mobility: relationship with lung function, respiratory muscle strength, dyspnea, and physical activity in daily life in patients with COPD. *J bras pneumol*. 2017;43(1):32-7.
  102. Rodrigues ESR, Moreira RDF, Rezende AAB, Costa LD. SEDENTARISM AND SMOKING IN PATIENTS WITH CARDIOVASCULAR, RESPIRATORY AND ORTHOPEDIC DISEASES. *REV ENFERMAGEM UFPE*. 2014;8(3):591-9.
  103. Schneider PL, Couto FK, Aparecida HN, Pitta F. Does the wearing time of motion sensor interfere with the choice of physical activity in daily life outcomes of COPD patients? *FISIOTER PESQUISA*. 2018 Jan;25(1):43-8.
  104. Silva DR, Coelho AC, Dumke A, Valentini JD, de Nunes JN, Stefani CL, et al. Osteoporosis Prevalence and Associated Factors in Patients With COPD: A Cross-Sectional Study. *Respir Care*. 2011;56(7):961-8.
  105. Simon KM, Hass AP, Zimmermman JL, Carpes MF. Índice prognóstico de mortalidade BODE e atividade física em doentes pulmonares obstrutivos crônicos. *Rev bras med esporte*.

- 2009;15(1):19-22.
106. Tavares MG, Nascimento, Alessandra CSD, Ferraz, Marília CCN, Medeiros, Rafael ABD, Cabral PC, Burgos, Maria GPDA. Excesso de peso e obesidade em portadores de doença pulmonar obstrutiva crônica. *Braspen J.* 2017;32(1):58-62.
  107. Vitorasso R, Camillo CA, Cavalheri V, Aparecida Hernandez N, Cortez Verceze A, Sant'anna T, et al. Is walking in daily life a moderate intensity activity in patients with chronic obstructive pulmonary disease? *EUR J PHYS REHABIL MED.* 2012;48(4):587-92.
  108. Xavier R, Lopes AC, Pereira ACAC, Mancini MC, Ramos EMC, Stelmach R, et al. Factors associated with daily life physical activity in Brazilian COPD patients. *Eur Respir J.* 2016;48.
  109. Yunus FM, Khan S, Mitra DK, Mistry SK, Afsana K, Rahman M. Relationship of sleep pattern and snoring with chronic disease: findings from a nationwide population-based survey. *Sleep Health.* 2018;4(1):40-8.
  110. Bhuker M, Kapoor S. Environmental and occupational respiratory diseases-1043. Effects of socioeconomic status, life style patterns and demographic factors. *World Allergy Organ J.* 2013;6.
  111. De S. Subjective assessment of quality of sleep in chronic obstructive pulmonary disease patient and its relationship with associated depression. *Lung India.* 2012;29(4):332-5.
  112. Gupta R, Ulfberg J, Allen RP, Goel D. Comparison of subjective sleep quality of long-term residents at low and high altitudes: SARAHA study. *J Clin Sleep Med.* 2018;14(1):15-21.
  113. Panigrahi MK, Padhan M, Mohapatra PR. Relationship between sleep quality, asthma control and quality of life in adults with asthma. *Am J Respir Crit Care Med.* 2018;197.
  114. Poongadan MN, Gupta N, Kumar R. Lifestyle factors and asthma in India - a case-control study. *Pneumonol Alergol Pol.* 2016;84(2):104-8.
  115. Sharma K, Jain A, Goyal V, Goel N, Takhar R, Singh V, et al. Depression and physical activity impairment in COPD subjects. *J Clin Diagn Res.* 2019;13(7):OC16-22.
  116. Ulfathinah A, Rachmi SF, Indracahyani A. Characteristics affecting sleep quality of COPD patients. *ENFERM CLIN.* 2019;29:30-5.
  117. Widyastuti K, Makhabah DN, Rima A, Sutanto YS, Suradi S, Ambrosino N. Home based pulmonary rehabilitation with pedometers in Indonesian COPD patients. *European respiratory journal.* 2017;50.
  118. Chanthitvech N, Sirichana W. Cardiopulmonary exercise testing parameters and level of daily physical activity correlation in stable COPD patients. *Eur Respir J.* 2017;50.
  119. Chunrong J, Rongchang C. Factors associated with impairment of quadriceps muscle function in Chinese patients with chronic obstructive pulmonary disease. *PLoS ONE.* 2014;9(2):e84167.
  120. Ding B, Small M, Bergstrom G, Holmgren U. A cross-sectional survey of night-time symptoms and impact of sleep disturbance on symptoms and health status in patients with COPD. *Int J COPD.* 2017;12:589-99.
  121. Tao Y-, Wang L, Dong X-, Zheng H, Zheng Y-, Tang X-, et al. Psychometric properties of the physical activity scale for the elderly in chinese patients with COPD. *Int J COPD.* 2017;12:105-14.
  122. Wang L, Nygardh A, Zhao Y, Martensson J. Self-management among patients with chronic obstructive pulmonary disease in China and its association with sociodemographic and clinical variables. *Appl Nurs Res.* 2016;32:61-6.
  123. Wang L, Tao Y, Dong X, Zhang Q, Zheng H, Zheng Y, et al. Demographic, health behavioral, and selfmanagement abilities associated with disease severity among patients with chronic obstructive pulmonary disease: An exploratory study. *International Journal of Nursing Practice.* 2017;23(1):n/a,N.PAG.
  124. Wang S, Wu Y, Ungvari GS, Ng CH, Forester BP, Gatchel JR, et al. Sleep duration and its association with demographics, lifestyle factors, poor mental health and chronic diseases in older Chinese adults. *Psychiatry Res.* 2017;257:212-8.
  125. Zheng L, Wang A. Application effect of rational emotional behavior therapy for home chronic obstructive pulmonary disease patients with depression. *Chinese Nursing Journal.* 2019;33:1135-40.
  126. Vancampfort D, Koyanagi A, Ward PB, Rosenbaum S, Schuch FB, Mugisha J, et al. Chronic physical conditions, multimorbidity and physical activity across 46 low and middle income countries. *Int J Behav Nutr Phys Act.* 2017;14(1):6.
  127. Koyanagi A, Stubbs B, Smith L, Gardner B, Vancampfort D. Correlates of physical activity among community-dwelling adults aged 50 or over in six low- and middle-income countries. *PLoS ONE.* 2017;12(10):e0186992.
  128. Vancampfort D, Stubbs B, Koyanagi A. Physical chronic conditions, multimorbidity and

- sedentary behavior amongst middle-aged and older adults in six low- and middle-income countries. *Int J Behav Nutr Phys Act.* 2017;14(1):147.
129. Vancampfort D, Lara E, Stubbs B, Swinnen N, Probst M, Koyanagi A. Physical activity correlates in people with mild cognitive impairment: findings from six low- and middle-income countries. *Public Health.* 2018;156:15-25.
  130. Vancampfort D, Stubbs B, Veronese N, Mugisha J, Swinnen N, Koyanagi A. Correlates of physical activity among depressed older people in six low-income and middle-income countries: A community-based cross-sectional study. *Int J Geriatr Psychiatry.* 2018;33(2):e314-22.
  131. Vancampfort D, Stubbs B, Mugisha J, Firth J, Schuch FB, Koyanagi A. Correlates of sedentary behavior in 2,375 people with depression from 6 low- and middle-income countries. *J Affective Disord.* 2018;234:97-104.

**Appendix D: Summary of studies including a control group**

| Reference                      | Patient summary data                                                                                                                                                                                                                                                                              | Control group definition                                                                                                                                  | Control group sample size | Control group average age                 | Control group gender mix | Control group summary data                                                                                                                                                                                                                                                                |
|--------------------------------|---------------------------------------------------------------------------------------------------------------------------------------------------------------------------------------------------------------------------------------------------------------------------------------------------|-----------------------------------------------------------------------------------------------------------------------------------------------------------|---------------------------|-------------------------------------------|--------------------------|-------------------------------------------------------------------------------------------------------------------------------------------------------------------------------------------------------------------------------------------------------------------------------------------|
| Ali Zohal (2013) <sup>46</sup> | Poor sleep quality (67.9%); PSQI score (8.03±3.66); Subjective sleep quality (1.9±0.8); Delay in initiation of sleep (1.3±0.5); Sleep duration (1.5±0.6); Sleep satisfaction (1.4±0.9); Sleep disturbance (2.1±1.1); Use of hypnotic drugs (2.2±0.7); Disturbance in daytime activities (1.9±0.9) | Individuals with comparable age and gender                                                                                                                | 120                       | 57.3 (6.4)                                | 54.1% male               | Poor sleep quality (27.5%); PSQI (4.2±2.8); Subjective sleep quality (1.4±0.7); Delay in initiation of sleep (0.9±0.7); Sleep duration (1.3±0.8); Sleep satisfaction (0.9±0.4); Sleep disturbance (1.9±0.6); Use of hypnotic drugs (1.2±0.5); Disturbance in daytime activities (1.1±0.3) |
| Amorim (2014) <sup>66</sup>    | Step count (6,251.0 ± 2,422.8); distance walked (3.9 ± 1.9 km/day); time spent walking (68.5 ± 25.8 min/day)                                                                                                                                                                                      | healthy elderly individuals, which comprised spouses of the patients with COPD and individuals treated at the geriatric outpatient clinic of our hospital | 40                        | 66.7 (9.9)                                | 52.5% female             | Step count (9,854.1 ± 4,736.6); distance walked (6.4 ± 3.2 km/day); time spent walking (105.2 ± 49.4 min/day)                                                                                                                                                                             |
| Bhuker (2012) <sup>110</sup>   | Not provided                                                                                                                                                                                                                                                                                      | No description (free from asthma)                                                                                                                         | 50                        | Not provided                              | Not provided             | Not provided                                                                                                                                                                                                                                                                              |
| Cetlin (2012) <sup>72</sup>    | Active (97/200); Inactive (103/200)                                                                                                                                                                                                                                                               | No asthma (interpreted by MO, not by the paper)                                                                                                           | 1922                      | Not provided                              | 980/1922 female          | Active (1016/1922); Inactive (706/1922)                                                                                                                                                                                                                                                   |
| Chunrong (2014) <sup>119</sup> | PA score 5.05±1.89                                                                                                                                                                                                                                                                                | Age-matched healthy controls                                                                                                                              | 60                        | 64.01 (5.41)                              | 65% female               | PA score 7.97±1.21                                                                                                                                                                                                                                                                        |
| Coelho (2018) <sup>73</sup>    | 7490.3±3330.2 steps/day                                                                                                                                                                                                                                                                           | Gender-matched healthy controls                                                                                                                           | 30                        | 44.3 (11.6)                               | 100% female              | 6876.4±3242.1 steps/day                                                                                                                                                                                                                                                                   |
| Genc (2014) <sup>58</sup>      | 632.4±221.0 kcal/12hours                                                                                                                                                                                                                                                                          | BMI- and gender-matched healthy nonsmoker controls                                                                                                        | 30                        | 53.0 (5.9)                                | 100% male                | 637.7±313.5 kcal/12hours                                                                                                                                                                                                                                                                  |
| Hernandes (2009) <sup>85</sup> | Time spent walking (55 ± 33 min/day; 7% of time), standing (36% of time), sitting (294 ± 114 min/day; 41% of time) or lying (15% of time); intensity of the movement during walking (1.9 ± 0.4 m/s); undefined activity/posture (1% of time)                                                      | Healthy and sedentary individuals matched to the COPD patients regarding age, gender and anthropometric characteristics.                                  | 30                        | 64 (7)                                    | 16/30 female             | Time spent walking (80 ± 28 min/day; 10% of time), standing (39% of time), sitting (246 ± 122 min/day; 34% of time) or lying (15% of time); intensity of the movement during walking (2.3 ± 0.6 m/s); undefined activity/posture (2% of time)                                             |
| Mahmood (2019) <sup>50</sup>   | Inactive (33.9%); Moderately inactive (30.4%); Moderately active (21.4%); Active (14.3%)                                                                                                                                                                                                          | Age and gender matched nonrelatives to the patients who attended the hospital                                                                             | 45                        | 40-49 (42.2%); 50-59 (31.1%); 60+ (26.7%) | 73.3% female             | Inactive (33.3%); Moderately inactive (35.6%); Moderately active (26.7%); Active (4.4%)                                                                                                                                                                                                   |

|                                 |                                                                                                                            |                                                                                                                                                                              |        |                                                        |                    |                                                                                                                            |
|---------------------------------|----------------------------------------------------------------------------------------------------------------------------|------------------------------------------------------------------------------------------------------------------------------------------------------------------------------|--------|--------------------------------------------------------|--------------------|----------------------------------------------------------------------------------------------------------------------------|
| Moussa (2014) <sup>51</sup>     | Household (0.88±0.31), sporting (0.33±0.54), and leisure activities (1.64±0.58); total physical activity score (2.86±0.78) | Smokers free from COPD                                                                                                                                                       | 29     | 47.93 (5.66)                                           | 100% male          | Household (1.36±0.53), sporting (4.42±4.84), and leisure activities (2.53±1.63); total physical activity score (8.31±4.86) |
| Moussa (2016) <sup>52</sup>     | Household (0.88±0.31), sporting (0.33±0.54), and leisure activities (1.64±0.58); total physical activity score (2.86±0.78) | Smokers free from COPD                                                                                                                                                       | 16     | 46.54 (4.14)                                           | 100% male          | Household (1.37±0.52), sporting (3.30±1.90), and leisure activities (2.48±1.41); total physical activity score (7.14±1.50) |
| Poongadan (2016) <sup>114</sup> | Not presented for adults                                                                                                   | Age- and sex-matched healthy controls                                                                                                                                        | 125    | Not provided                                           | 70/125 male        | Not presented for adults                                                                                                   |
| Vukoja (2018) <sup>55</sup>     | Asthma 4.9±3.9, 40.4% poor sleep quality; COPD 5.8±4.3, 38% poor sleep quality                                             | healthynonsmoking subjects, nonshift medical workers with nocomorbidities, and no respiratory symptoms, who did notcomplain of snoring and had no witnessed nocturnal apneas | 102    | 43 (14)                                                | 58.8% male         | PSQI score 4±2; 22.5% poor sleep quality                                                                                   |
| Wang (2017) <sup>124</sup>      | Total sleep time (not stated); Short sleepers (N=164/334); Medium sleepers (N=111/334); Long sleepers (N=59/334)           | Zero morbidities (interpreted by MO, not by the paper)                                                                                                                       | 401    | Not provided                                           | Not provided       | Total sleep time (not stated); Short sleepers (N=167/401); Medium sleepers (N=183/401); Long sleepers (N=51/401)           |
| Yunus (2018) <sup>109</sup>     | <7 hours (N=32/116), 7-9 hours (N=74/116), and >9 hours (N=10/116)                                                         | No chronic disease (interpreted by MO, not by the paper)                                                                                                                     | 10,147 | <40 (24.2%); 40-44 (12.5%); 45-49 (11.3%); 50+ (52.0%) | 5077/10,147 female | <7 hours (N=1178/10130), 7-9 hours (N=7717/10130), and >9 hours (N=1235/10130)                                             |

**Appendix E: Quality of reporting of studies using device-based measurement of physical behaviours**

| <b>Author (Year)</b>         | <b>Model of device</b>                | <b>Body location worn</b>                              | <b>Feedback provided to participants</b> | <b>Period of wear</b>  | <b>Valid wear time requirement</b> | <b>Fixed or minimum wear time?</b> | <b>Number of valid days/nights required</b> | <b>Fixed or minimum valid days</b> | <b>Non-wear detection/description of identifying missing data or device taken off</b> | <b>Average wear time</b> | <b>Can waking wear time be calculated from behaviour data?</b> |
|------------------------------|---------------------------------------|--------------------------------------------------------|------------------------------------------|------------------------|------------------------------------|------------------------------------|---------------------------------------------|------------------------------------|---------------------------------------------------------------------------------------|--------------------------|----------------------------------------------------------------|
| <b>Accelerometer</b>         |                                       |                                                        |                                          |                        |                                    |                                    |                                             |                                    |                                                                                       |                          |                                                                |
| Lopes (2019) <sup>90</sup>   | ActiGraph GT3X+                       | Worn around the waist at the lower back                | No feedback                              | 6 days                 | 8 hours                            | Minimum                            | 4 days                                      | Minimum                            | Not stated                                                                            | Not stated               | No                                                             |
| Xavier (2016) <sup>108</sup> | ActiGraph GT3X+                       | Not stated                                             | Not stated                               | Not stated             | Not stated                         | Not stated                         | Not stated                                  | Not stated                         | Not stated                                                                            | Not stated               | No                                                             |
| Freitas (2018) <sup>80</sup> | ActiGraph GT3X+ and ActiSleep monitor | AG: Hip on non-dominant side; AS: Non-dominant wrist   | Not stated                               | 7 consecutive nights   | Not stated                         | Not stated                         | Not stated                                  | Not stated                         | Not stated                                                                            | Not stated               | Yes                                                            |
| Saglam (2013) <sup>61</sup>  | Caltrac                               | Not stated                                             | Not stated                               | 2 days                 | Not stated                         | Not stated                         | Not stated                                  | Not stated                         | Not stated                                                                            | Not stated               | No                                                             |
| Borges (2012) <sup>68</sup>  | Dynaport                              | Lower back in the region of the second lumbar vertebra | Not stated                               | 2 consecutive weekdays | Not stated                         | Not stated                         | Not stated                                  | Not stated                         | Not stated                                                                            | Not stated               | Yes                                                            |
| Cani (2019) <sup>70</sup>    | Dynaport                              | Not stated                                             | Not stated                               | 2 consecutive days     | 12 hours                           | Fixed                              | Not stated                                  | Not stated                         | Not stated                                                                            | Not stated               | Yes                                                            |
| Fonesca (2016) <sup>79</sup> | Dynaport                              | Not stated                                             | Not stated                               | 2 consecutive weekdays | 12 hours                           | Fixed                              | 2 days                                      | Fixed                              | Diary to record monitoring times                                                      | Not stated               | Yes                                                            |

|                                |                       |                                                                                            |            |                        |          |       |            |            |                                                                      |            |     |
|--------------------------------|-----------------------|--------------------------------------------------------------------------------------------|------------|------------------------|----------|-------|------------|------------|----------------------------------------------------------------------|------------|-----|
| Gulart (2019) <sup>84</sup>    | Dynaport              | Not stated                                                                                 | Not stated | 2 consecutive days     | 12 hours | Fixed | 2 days     | Fixed      | Not stated                                                           | Not stated | Yes |
| Hernandes (2009) <sup>85</sup> | Dynaport              | Small box positioned at the waist and a sensor of lower limb activity strapped to the body | Not stated | 2 consecutive weekdays | 12 hours | Fixed | 2 days     | Fixed      | Not stated                                                           | Not stated | Yes |
| Landal (2014) <sup>88</sup>    | Dynaport              | Not stated                                                                                 | Not stated | 2 consecutive days     | 12 hours | Fixed | 2 days     | Fixed      | Not stated                                                           | Not stated |     |
| Munari (2018) <sup>94</sup>    | Dynaport              | Not stated                                                                                 | Not stated | 2 consecutive weekdays | 12 hours | Fixed | 2 days     | Fixed      | Participants asked to record exact time of putting on and taking off | Not stated | Yes |
| Pitta (2009) <sup>98</sup>     | Dynaport              | Box enclosed in a belt worn around the waist and a leg sensor                              | Not stated | 2 consecutive weekdays | 12 hours | Fixed | 2 days     | Fixed      | Not stated                                                           | Not stated | Yes |
| Rocha (2017) <sup>101</sup>    | Dynaport              | Waist                                                                                      | Not stated | 2 consecutive days     | 12 hours | Fixed | 2 days     | Fixed      | Not stated                                                           | Not stated | Yes |
| Karloh (2016) <sup>87</sup>    | Dynaport MiniMod      | Not stated                                                                                 | Not stated | 2 consecutive weekdays | 12 hours | Fixed | Not stated | Not stated | Not stated                                                           | Not stated | Yes |
| Morita (2018) <sup>93</sup>    | Dynaport Move Monitor | Lower back                                                                                 | Not stated | 2 days                 | 12 hours | Fixed | 2 days     | Fixed      | Not stated                                                           | Not stated | Yes |



|                                    |                                   |                                                                                                                                                                                                           |            |                                         |                         |            |            |            |            |                                                |     |
|------------------------------------|-----------------------------------|-----------------------------------------------------------------------------------------------------------------------------------------------------------------------------------------------------------|------------|-----------------------------------------|-------------------------|------------|------------|------------|------------|------------------------------------------------|-----|
| Genc (2012) <sup>57</sup>          | RT3                               | Right hip                                                                                                                                                                                                 | Not stated | 3 days                                  | 12 hours<br>(0800-2000) | Fixed      | 3 days     | Fixed      | Not stated | Not<br>stated                                  | No  |
| Genc (2014) <sup>58</sup>          | RT3                               | Right hip                                                                                                                                                                                                 | Not stated | 3 days                                  | 12 hours<br>(0800-2200) | Fixed      | 3 days     | Fixed      | Not stated | Not<br>stated                                  | No  |
| Furlanetto<br>(2016) <sup>81</sup> | SenseWear<br>Armband              | Upper arm                                                                                                                                                                                                 | Not stated | 2 days                                  | 12 hours                | Fixed      | 2 days     | Fixed      | Not stated | Not<br>stated                                  | No  |
| Schneider<br>(2018) <sup>103</sup> | SenseWear<br>Armband              | Right upper<br>arm area<br>(brachial triceps<br>muscle area)                                                                                                                                              | Not stated | 7<br>consecutive<br>days                | 8 hours, 12<br>hours    | Fixed      | Not stated | Not stated | Not stated | Median<br>[IQR]<br>889.6<br>[849.2 –<br>923.1] | Yes |
| Furlanetto<br>(2017) <sup>82</sup> | SenseWear<br>Armband;<br>Dynaport | SWA: Upper<br>arm; D: Lower<br>back                                                                                                                                                                       | Not stated | 2 weekday<br>[Tuesday and<br>Wednesday] | 12 hours                | Fixed      | 2 days     | Fixed      | Not stated | Not<br>stated                                  | Yes |
| Mantoani<br>(2011) <sup>91</sup>   | SenseWear<br>Armband;<br>Dynaport | SWA: Superior<br>and posterior<br>area of the<br>right arm (in<br>the brachial<br>triceps area); D:<br>Small box<br>positioned in<br>the waist and an<br>activity sensor<br>attached to the<br>lower limb | Not stated | 2 days                                  | Not stated              | Not stated | Not stated | Not stated | Not stated | Not<br>stated                                  | Yes |



|                                  |                                                                                      |                                                                                                          |                                                                                             |                        |            |            |                                                     |            |            |            |    |
|----------------------------------|--------------------------------------------------------------------------------------|----------------------------------------------------------------------------------------------------------|---------------------------------------------------------------------------------------------|------------------------|------------|------------|-----------------------------------------------------|------------|------------|------------|----|
| Lanza (2018) <sup>89</sup>       | Not stated                                                                           | Right pocket on the anterior surface of their clothes                                                    | Not stated                                                                                  | 5 consecutive weekdays | Not stated | Not stated | First and last day excluded; 3 consecutive weekdays | Fixed      | Not stated | Not stated | No |
| Widyastuti (2017) <sup>117</sup> | Not stated                                                                           | Not stated                                                                                               | Not stated                                                                                  | Not stated             | Not stated | Not stated | Not stated                                          | Not stated | Not stated | Not stated | No |
| Yilmaz (2016) <sup>63</sup>      | Omron HJ-321-E                                                                       | Waistband                                                                                                | Not stated                                                                                  | Not stated             | Not stated | Not stated | Not stated                                          | Not stated | Not stated | Not stated | No |
| Tao (2016) <sup>121</sup>        | SP600; Shenzhenshi Sibowei Technology Co., Ltd, Shenzhen, People's Republic of China | Not stated                                                                                               | Not stated                                                                                  | 7 days                 | Not stated | Not stated | Not stated                                          | Not stated | Not stated | Not stated | No |
| Nyssen (2013) <sup>97</sup>      | Yamax Digi-Walker SW-700                                                             | Waistline, at the level of the right anterosuperior iliac crest, being clipped to their belt or clothes. | Patients were instructed to keep a diary to report the activities performed every one hour. | 3 consecutive days     | Not stated | Not stated | 3 days                                              | Fixed      | Not stated | Not stated | No |
| Felcar (2018) <sup>77</sup>      | Yamax PowerWalker-PW610                                                              | Not stated                                                                                               | Not stated                                                                                  | 6 days                 | 12 hours   | Fixed      | 6 days                                              | Fixed      | Not stated | Not stated | No |

|                             |              |            |                                     |                    |            |            |                                       |         |            |            |    |
|-----------------------------|--------------|------------|-------------------------------------|--------------------|------------|------------|---------------------------------------|---------|------------|------------|----|
| Coelho (2018) <sup>73</sup> | YAMAX SW-200 | Waistline  | Yes, asked to record steps in diary | 6 consecutive days | Not stated | Not stated | 5 days including 1 day at the weekend | Minimum | Not stated | Not stated | No |
| Coelho (2018) <sup>74</sup> | YAMAX SW-200 | Not stated | Recorded steps in a diary each day  | 6 consecutive days | Not stated | Not stated | 5 days including 1 day at the weekend | Minimum | Not stated | Not stated | No |

**Appendix F: Quality of reporting of studies using questionnaire-based measurement of physical behaviours**

| <b>Author (Year)</b>           | <b>Questionnaire/question</b>                                                                                                                                                                                                                                                                                                                                                                                       | <b>Recall period</b>            | <b>Handling missing data</b> |
|--------------------------------|---------------------------------------------------------------------------------------------------------------------------------------------------------------------------------------------------------------------------------------------------------------------------------------------------------------------------------------------------------------------------------------------------------------------|---------------------------------|------------------------------|
| Simon (2009) <sup>105</sup>    | American College of Sports Medicine (ACSM)                                                                                                                                                                                                                                                                                                                                                                          | Not stated                      | Not stated                   |
| Chunrong (2014) <sup>119</sup> | Baeke                                                                                                                                                                                                                                                                                                                                                                                                               | 3 years                         | Not stated                   |
| Mihaltan (2019) <sup>53</sup>  | Clinical judgement, Patients self-reported their level of physical activity by answering two questions during clinical interview. These questions were derived from the exercise vital sign (EVS) program <sup>[30]</sup> and refer to the number of days per week that patients engage in moderate to strenuous exercise and the number of minutes spent doing such exercise; Yale Physical Activity Survey (YPAS) | YPAS: 1 month                   | Not stated                   |
| Molinas (2007) <sup>65</sup>   | Days per week they do at least 30 minutes of exercise                                                                                                                                                                                                                                                                                                                                                               | Not stated                      | Not stated                   |
| Gupta (2018) <sup>112</sup>    | Does your time to bed and wake time remain almost the same on at least 5 nights a week?; PSQI; Godin leisure-time exercise questionnaire                                                                                                                                                                                                                                                                            | Godin 1 week; others not stated | Not stated                   |
| Mahmood (2019) <sup>50</sup>   | General Practice Physical Activity Questionnaire (GPPAQ).                                                                                                                                                                                                                                                                                                                                                           | Not stated                      | Not stated                   |
| Koyanagi (2017) <sup>127</sup> | GPAQ                                                                                                                                                                                                                                                                                                                                                                                                                | Not stated                      | Not stated                   |

|                                   |                   |            |            |
|-----------------------------------|-------------------|------------|------------|
| Vancampfort (2017) <sup>130</sup> | GPAQ              | 1 week     | Not stated |
| Vancampfort (2018) <sup>131</sup> | GPAQ              | Not stated | Not stated |
| Vancampfort (2018) <sup>129</sup> | GPAQ              | 1 week     | Not stated |
| Da Costa (2012) <sup>75</sup>     | IPAQ              | 3 months   | Not stated |
| Cukier (2020) <sup>76</sup>       | IPAQ              | Not stated | Not stated |
| Jardim (2011) <sup>86</sup>       | IPAQ              | Not stated | Not stated |
| Reboredo (2017) <sup>100</sup>    | IPAQ              | Not stated | Not stated |
| Turan (2016) <sup>62</sup>        | IPAQ              | 7 days     | Not stated |
| Vancampfort (2017) <sup>126</sup> | IPAQ              | 1 week     | Not stated |
| Silva (2011) <sup>104</sup>       | IPAQ Long Version | 7 days     | Not stated |

|                                 |                                                                                                                                                                                                                                                                                                                                                                                                                                                                                                                                                                                     |            |            |
|---------------------------------|-------------------------------------------------------------------------------------------------------------------------------------------------------------------------------------------------------------------------------------------------------------------------------------------------------------------------------------------------------------------------------------------------------------------------------------------------------------------------------------------------------------------------------------------------------------------------------------|------------|------------|
| Pehlivan (2019) <sup>59</sup>   | IPAQ-SF                                                                                                                                                                                                                                                                                                                                                                                                                                                                                                                                                                             | Not stated | Not stated |
| Rodrigues (2014) <sup>102</sup> | IPAQ-SF                                                                                                                                                                                                                                                                                                                                                                                                                                                                                                                                                                             | 1 week     | Not stated |
| Ding (2017) <sup>120</sup>      | JSEQ; How often in the past 4 weeks did you: have trouble falling asleep?; How often in the past 4 weeks did you: wake up several times per night?; How often in the past 4 weeks did you: have trouble staying asleep (including waking up earlier than normal)?; How often in the past 4 weeks did you: have trouble staying asleep (including waking up earlier than normal)?; How often in the past 4 weeks did you: wake up after your usual amount of sleep feeling tired and worn out? (0: Not at all, 1: 1-3 days; 2: 4-7 days, 3: 8-14 days; 4: 15-21 days; 5: 22-28 days) | 4 weeks    | Not stated |
| Sharma (2019) <sup>115</sup>    | Modified Baecke's Questionnaire                                                                                                                                                                                                                                                                                                                                                                                                                                                                                                                                                     | Not stated | Not stated |
| Nyssen (2013) <sup>97</sup>     | Modified Baeke; IPAQ-SF                                                                                                                                                                                                                                                                                                                                                                                                                                                                                                                                                             | Not stated | Not stated |
| Lopez Jove (2013) <sup>64</sup> | More than 150 minutes at least 3 times/week                                                                                                                                                                                                                                                                                                                                                                                                                                                                                                                                         | Not stated | Not stated |
| Borji (2018) <sup>47</sup>      | Not provided                                                                                                                                                                                                                                                                                                                                                                                                                                                                                                                                                                        | Not stated | Not stated |

|                                 |                    |            |            |
|---------------------------------|--------------------|------------|------------|
| Filippin (2011) <sup>78</sup>   | Not provided       | Not stated | Not stated |
| Poongadan (2016) <sup>114</sup> | Not provided       | Not stated | Not stated |
| Tavares (2017) <sup>106</sup>   | Not provided       | Not stated | Not stated |
| Tao (2016) <sup>121</sup>       | PASE-C; IPAQ-Short | 7 days     | Not stated |
| Adetiloye (2018) <sup>43</sup>  | PSQI               | 1 month    | Not stated |
| Adewolea (2017) <sup>44</sup>   | PSQI               | Not stated | Not stated |
| Akinci (2013) <sup>56</sup>     | PSQI               | 1 month    | Not stated |
| Ali Zohal (2013) <sup>46</sup>  | PSQI               | 4 weeks    | Not stated |
| Campos (2017) <sup>69</sup>     | PSQI               | Not stated | Not stated |
| Cavalcante (2012) <sup>71</sup> | PSQI               | Not stated | Not stated |



|                                  |      |            |                                                                                                                |
|----------------------------------|------|------------|----------------------------------------------------------------------------------------------------------------|
| Chegeni (2018) <sup>48</sup>     | PSQI | 1 month    | Not stated                                                                                                     |
| De (2012) <sup>111</sup>         | PSQI | 1 month    | Not stated                                                                                                     |
| Eslaminejad (2017) <sup>49</sup> | PSQI | 1 month    | Not stated                                                                                                     |
| Nobeschi (2020) <sup>95</sup>    | PSQI | 1 month    | Not stated                                                                                                     |
| Nunes (2008) <sup>96</sup>       | PSQI | Not stated | Component number 6 always scored zero because individuals on sleep medications were not included in this study |
| Panigrahi (2018) <sup>113</sup>  | PSQI | Not stated | Not stated                                                                                                     |
| Sahin (2015) <sup>60</sup>       | PSQI | 1 month    | Not stated                                                                                                     |

|                                  |                                                                                                                                                                                                                                                                                             |            |            |
|----------------------------------|---------------------------------------------------------------------------------------------------------------------------------------------------------------------------------------------------------------------------------------------------------------------------------------------|------------|------------|
| Ulfathinah (2019) <sup>116</sup> | PSQI                                                                                                                                                                                                                                                                                        | Not stated | Not stated |
| Vukoja (2018) <sup>55</sup>      | PSQI                                                                                                                                                                                                                                                                                        | Not stated | Not stated |
| Zheng (2019) <sup>125</sup>      | PSQI                                                                                                                                                                                                                                                                                        | Not stated | Not stated |
| Athayde (2014) <sup>67</sup>     | Regular physical activity was considered moderate intensity exercise (three to six METs) for at least 30 minutes on most days of the week                                                                                                                                                   | Not stated | Not stated |
| Moussa (2014) <sup>51</sup>      | Voorrips                                                                                                                                                                                                                                                                                    | Not stated | Not stated |
| Moussa (2016) <sup>52</sup>      | Voorrips                                                                                                                                                                                                                                                                                    | Not stated | Not stated |
| Mihaltan (2019) <sup>54</sup>    | Yale Physical Activity Survey; Clinical interviews (EVS [Exercise as Vital Sign])                                                                                                                                                                                                           | Not stated | Not stated |
| Wang (2017) <sup>124</sup>       | How many hours do you sleep each day (24 h) on average in the past month?                                                                                                                                                                                                                   | 1 month    | Not stated |
| Desalu (2019) <sup>45</sup>      | Has asthma affected your physical health in any way in the last 12 months? If respondent answer yes, then in what ways has it physically affects in the night and daytime. Has asthma limited your ability to do daily activities or household work, sport/exercise and your sleep quality? | 12 months  | Not stated |

|                                   |                                                                                                                                                                                                                                                                                                                             |            |            |
|-----------------------------------|-----------------------------------------------------------------------------------------------------------------------------------------------------------------------------------------------------------------------------------------------------------------------------------------------------------------------------|------------|------------|
| Wang (2016) <sup>123</sup>        | How many hours per day they were physically active (eg, sports activities, walking, exercise, housecleaning) for at least 30 minutes.                                                                                                                                                                                       | Not stated | Not stated |
| Wang (2016) <sup>122</sup>        | How much physical activity do you have per day?                                                                                                                                                                                                                                                                             | Not stated | Not stated |
| Yunus (2018) <sup>109</sup>       | The difference between the time at which the participant switches off the light and the time at which they wake up, discounting the time needed to fall asleep plus the time to wake up”                                                                                                                                    | 1 day      | Not stated |
| Vancampfort (2017) <sup>128</sup> | Participants were asked to state the total time they usually spent (expressed in minutes per day) sitting or reclining including at work, at home, getting to and from places, or with friends (e.g. sitting at a desk, sitting with friends, travelling in car, bus, train, reading, playing cards or watching television) | Not stated | Not stated |
| Cetlin (2012) <sup>72</sup>       | Physical activity status was defined as active if the subject regularly practiced physical activity, including activity at work and inactive when the reply was negative.                                                                                                                                                   | Not stated | Not stated |
